# Supplementary material for: metaRE R Package for Meta-analysis of Transcriptome Data to Identify the Cis-regulatory Code behind the Transcriptional Reprogramming
Source: Preprints.org preprint supplement (doi:10.20944/preprints202005.0227.v1), 2020-05-13
Supplement: Supplementary file 1 [file supplementary]

## Sheet: summary
	hexamers (<1E-10)		septamers (<1E-10)		octamers (<1E-10)			hexamers (<1E-10)		septamers (<1E-10)		octamers (<1E-10)
PBH	up	down	up	down	up	down	Pbonferroni	up	down	up	down	up	down
noFC	126	14	261	1	285	0	noFC	95	10	205	0	205	0
FC1.5	134	0	291	0	325	0	FC1.5	114	0	225	0	236	0
FC2	108	0	195	0	210	0	FC2	79	0	147	0	155	0
Up-regulation		Up-regulation
K-mer groups	DAPv1 (TOMTOM)		E-value (euclidean)		FAMILY	PBM (TOMTOM)		E-value (euclidean)		FAMILY	Cis-BP (TOMTOM)		E-value (euclidean)		FAMILY
ACGCGT	CAMTA1		0.000118		CAMTA	-		-		-	M0582_1.02 (CAMTA2)	M0582_1.02 (AT5G64220)	0.0124		CAMTA
ACGCGG						-		-		-	M0581_1.02 (CAMTA3)		0.0178
ACGCGC						-		-		-
AACGCG	CAMTA1		0.000837		CAMTA	-		-		-	M2350_1.02 (FHY3)	M2350_1.02 (FHY3)	0.0228		FAR1
CACGCG						-		-		-	M0581_1.02 (CAMTA3)		0.0338		CAMTA
CGCGTA	-		-		-	-		-		-	-		-		-
CACGTG	bHLH18		4.14e-05		bHLH	PIF5		0.00189		bHLH	M0159_1.02 (bHLH104)	M0159_1.02 (bHLH104)	1.8e-05		bHLH
	bHLH74		0.00307			PIF4		0.00397			M0150_1.02 (bHLH13)	M0150_1.02 (AT1G01260)	3.56e-05	3.56e-05
	PIF7		0.00524			MYC4		0.00643			M0158_1.02 (PIF8)	M0158_1.02 (UNE10)	3.56e-05
ACACGT	BEH3		0.0273		BES1	ANAC055		0.0391		NAC	M0267_1.02 (ABF3)	M0267_1.02 (ABF3)	0.000168		bZIP
	BEH2		0.0334			-		-			M0329_1.02 (GBF4)		0.0018		bZIP
	BEH4		0.0405			-		-			M0150_1.02 (bHLH13)	M0150_1.02 (AT1G01260)	0.00246		bHLH
CACACG	-		-		-	-		-		-	M0267_1.02 (ABF3)		0.0396		bZIP
ACGTGG	bZIP43		0.00717		bZIP	PIF3		0.00517		bHLH	M0158_1.02 (PIF8)		0.00357		bHLH
	bZIP42		0.0102			bZIP60_2		0.0317		bZIP	M1921_1.02 (AtbZIP44)		0.00362		bZIP
	bZIP16		0.0102			-		-		-	M0252_1.02 (CIB5)		0.00517		bHLH
CGTGGA	GBF6		7.42e-07		bZIP	-		-		-	M1921_1.02 (AtbZIP44)		2.97e-08		bZIP
CGTGGC	bZIP48		2.55e-05			-		-		-	M2344_1.02 (HY5)		0.000468		bZIP
CGTGTC	bZIP53		3.64e-05			-		-		-	M0261_1.02 (ABI5)		0.00199		bZIP
CACGTA	-		-		-	ANAC055		0.0343		NAC	-		-		-
ACGTAA	-		-		-	ANAC055		0.018		NAC	M1400_1.02 (anac025)		0.00532		NAC
ACGTAT	-		-		-	-		-		-	-		-		-
CGTATA	-		-		-	-		-		-	-		-		-
TACGTA	-		-		-	-		-		-	-		-		-
CCCCAC	TCP17		0.0452		TCP	-		-		-	M1654_1.02 (TCP23)		0.0067		TCP
	-		-		-	-		-		-	M1662_1.02 (TC15)		0.0309
CCGACA	CBF4	AP2EREBP_tnt.CBF4_colamp_a_m1 (CBF4)	0.00542		AP2/ERF	AT1G77200		0.024		AP2/ERF	M0030_1.02 (CBF2,FTQ4)		3.56e-05		AP2/ERF
	AT4G16750	AP2EREBP_tnt.At4g16750_colamp_a_m1 (At4g16750)	0.00629			DEAR4		0.024			M0034_1.02 (AT4G32800)		0.00017
	AT1G77200		0.00717			DREB2C_2	DREB2C_2	0.024			M0072_1.02 (AT1G01250)		0.00266
	CBF2		0.0082			ETT, ARF3		0.024		B3/ARF	M0075_1.02 (DEAR3)		0.00266
ACCGAC	DEAR5		0.000999		AP2/ERF	DEAR3_2	DEAR3_2	0.00517		AP2/ERF	M0073_1.02 (AT1G33760)		8.91e-05		AP2/ERF
	CEJ1		0.0082			DEAR4		0.0198		AP2/ERF	M0072_1.02 (AT1G01250)		0.000617
	DEAR3		0.0082			AT1G77200		0.029		AP2/ERF	M0075_1.02 (DEAR3)		0.000825
	AT3G16280		0.00922			DREB2C_2		0.0317			M0034_1.02 (AT4G32800)		0.00108
AGTATA	-		-		-	-		-		-	-		-		-
ACTATA	-		-		-	-		-		-	-		-		-
TTATAA	-		-		-	-		-		-	-		-		-
ATATAA	-		-		-	-		-		-	M4266_1.02 (TBP2)		0.00741		TBP
ATATAT
GTTATA	-		-		-	-		-		-	-		-		-
CATATA	-		-		-	-		-		-	M4266_1.02 (TBP2)		0.0266		TBP
GATATA	-		-		-	-		-		-
AATATA
TATATA
AATAAT	ATHB21		0.000294		HB	ATHB51		3.5e-05	3.5e-05	HB	M0854_1.02 (ATHB16)		0.00099		HD-ZIP
AATTAT	ATHB40		0.00133			ICU4		0.0202			M1932_1.02 (ATHB5)		0.00151
	ATHB53		0.002			-		-			M1842_1.02 (HAT5)		0.00374
ATTATA	-		-		-	-		-		-	-		-		-
ATTATG
ATAATC	-		-		-	YAB1 (YAB1)		0.0201		YABBY	M0854_1.02 (ATHB16)		0.0311		HD-ZIP
ATAATA
ATCATA	-		-		-
AATAGT	-		-		-	-		-		-	-		-		-
AATTGT	-		-		-	-		-		-	-		-		-
ATTACG	-		-		-	-		-		-	-		-		-
AATTAA	AT1G76110		0.00582		ARID?	-		-		-	M0850_1.02 (ANL2)		0.0141		HD-ZIP
CATTAA						-		-		-
AATTAG	-		-		-	-		-		-	-		-		-
CAATTA	ATHB20		0.00225		HB	-		-		-	M1842_1.02 (HAT5)		0.00684		HD-ZIP
TAATTA	HAT5		0.00884			-		-		-	-		-
ATATTC	-		-		-	-		-		-	M1303_1.02 (RVE6)		0.00242		MYB-like
ATATTA			0.0216	0.0216	G2-like	KAN4_2		0.0397			M1351_1.02 (RVE5)		0.0316		-
TATTCA	-		-		-	-		-		-	-		-		-
ATATCC	-		-		-	-		-		-	M1322_1.02 (AT1G74840)		0.0117		MYB-like
											M1309_1.02 (AT1G70000)		0.033
CATTTA	-		-		-	-		-		-	-		-		-
AATTTA	-		-		-	-		-		-	-		-		-
AATACT	-		-		-	-		-		-	-		-		-
AATACA	-		-		-	-		-		-	-		-		-
ATTTTA	-		-		-	-		-		-	-		-		-
ATTTAA	-		-		-	-		-		-	M0588_1.02 (AT2G20110)		0.0267		CPP
ATTTTG	-		-		-	-		-		-	-		-		-
AATTTG	-		-		-	-		-		-	-		-		-
TTTAAA	-		-		-	-		-		-	M0850_1.02 (ANL2)		0.0238		HD-ZIP
ATTAAT
ATAAAT
ATTAAA
ACAAAT
ACTAAT
ACTAAA
TTAAAA	-		-		-	-		-		-	-		-		-
TAGATA	-		-		-	-		-		-	M1303_1.02 (RVE6)		0.00982		MYB-like
AAAAAC	-		-		-	-		-		-	M0583_1.02 (ATGRP2B, CSP4)		7.97e-06		C3H-ZF
TAAAAA										-			7.97e-06
AAATAA	-		-		-	-		-		-	M1842_1.02 (HAT5)		0.0235		HB
GAATAA											M0583_1.02 (ATGRP2B)		0.0259		C3H-ZF
TAATAA											M0854_1.02 (ATHB16)		0.0455		HB
CATAAA	-		-		-	-		-		-	-	-	-	-	-
TATAAA
AATAAA
ACGTTA	-		-		-	Dof5.7_2 (Dof5.7_2)		0.0315		DOF	M0655_1.02 (OBP4, DOF5)		0.00557		DOF
GTATTA	-		-		-	-		-		-	-		-		-
ACATTA	-		-		-	-		-		-	-		-		-
ATGTTA	-		-		-	-		-		-	-		-		-
TACATA	-		-		-	-		-		-	-		-		-
CAAATA	-		-		-	-		-		-	M1303_1.02 (RVE6)		0.0202		MYB-like
CTAATA
ATACTA	-		-		-	-		-		-	-		-		-
ATAGTA
AAATAT	-		-		-	-		-		-	-		-		-
TATTAA
GTACTA	-		-		-	-		-		-	-		-		-
AATATC	LHY1		0.00196		MYB-like	CCA1		0.00302		MYB-like	M1303_1.02 (RVE6)		1.4e-05		MYB-like
	RVE1		0.00449			RVE1		0.00302			M1351_1.02 (RVE5)		0.00139
	LCL1/CCA1-like		0.00617			-		-			-		-
ATTATT	PDF2		0.0297		HD-ZIP	KAN4		0.0042		MYB-like	-		-		-
ATAAAG	AT1G69180 (CRC)		0.0225		YABBY	-		-		-	-		-		-
TAAATA	-		-		-	-		-		-	M0145_1.02 (AHL6)		0.0143		AT-hook
AAAATA
AAATTT
AAAATT
AAATTA
Down-regulation
K-mer groups	DAPv1 (TOMTOM)		E-value (euclidean)		FAMILY	PBM (TOMTOM)		E-value (euclidean)		FAMILY	Cis-BP (TOMTOM)		E-value (euclidean)		FAMILY
AAGCTG	-		-		-	-		-		-	-		-		-
AGCTGA	-		-		-	-		-		-	-		-		-
ATCCGA	GATA20		0.0431		GATA	-		-		-	-		-		-
CAGAAG	-		-		-	-		-		-	-		-		-
CTGAGA	-		-		-	-		-		-	-		-		-
CCTGCA	-		-		-	-		-		-	-		-		-
CTGCAA	-		-		-	-		-		-	-		-		-
CTCAGC	-		-		-	-		-		-	M2372_1.02 (CDC5)		0.00587		MYB
CAGCTC	-		-		-	-		-		-	-		-		-
GCCACC	-		-		-	-		-		-	-		-		-

## Sheet: hexamers_noFC
$up
k-mer	k-mer (reverse)	MetaPvalue	PBH	Pbonferroni
ACGCGT	ACGCGT	2.8637e-87	5.9565e-84	5.96e-84
CACGTG	CACGTG	7.29449e-58	7.58627e-55	1.52e-54
ACACGT	ACGTGT	1.10476e-56	7.65969e-54	2.3e-53
ACGTGG	CCACGT	1.27459e-55	6.62787e-53	2.65e-52
ATTAAT	ATTAAT	1.38879e-53	5.77736e-51	2.89e-50
TAAATA	TATTTA	3.9852e-48	1.38154e-45	8.29e-45
ATATTA	TAATAT	4.91572e-45	1.46067e-42	1.02e-41
ATATAT	ATATAT	6.22352e-42	1.61812e-39	1.29e-38
AATTAT	ATAATT	3.26231e-40	7.53955e-38	6.79e-37
ATAATA	TATTAT	2.23782e-39	4.65466e-37	4.65e-36
ACGTAT	ATACGT	2.61814e-39	4.95067e-37	5.45e-36
AACGCG	CGCGTT	6.35334e-39	1.10125e-36	1.32e-35
TAATAA	TTATTA	7.56249e-39	1.21e-36	1.57e-35
TATTAA	TTAATA	1.53747e-38	2.28424e-36	3.2e-35
ATTATA	TATAAT	2.23193e-37	3.09495e-35	4.64e-34
TATATA	TATATA	7.42343e-37	9.65046e-35	1.54e-33
TAATTA	TAATTA	1.31826e-36	1.58537e-34	2.74e-33
TTATAA	TTATAA	1.37195e-36	1.58537e-34	2.85e-33
ATAAAT	ATTTAT	7.09641e-36	7.7687e-34	1.48e-32
GTATTA	TAATAC	1.06401e-34	1.10657e-32	2.21e-31
AAATAA	TTATTT	1.96814e-34	1.94939e-32	4.09e-31
AATAAT	ATTATT	4.33976e-34	4.10304e-32	9.03e-31
AATTAA	TTAATT	1.40534e-33	1.27091e-31	2.92e-30
AATATA	TATATT	1.5531e-33	1.34602e-31	3.23e-30
ATTTTA	TAAAAT	1.91811e-33	1.59587e-31	3.99e-30
ATTAAA	TTTAAT	5.51462e-32	4.4117e-30	1.15e-28
AAATTA	TAATTT	1.51687e-30	1.16855e-28	3.16e-27
ATTTAA	TTAAAT	4.02055e-30	2.98669e-28	8.36e-27
TAGATA	TATCTA	1.41751e-29	1.0167e-27	2.95e-26
CACGTA	TACGTG	1.67591e-29	1.16196e-27	3.49e-26
AATATT	AATATT	3.1399e-29	2.10677e-27	6.53e-26
ATATAA	TTATAT	2.32299e-28	1.50994e-26	4.83e-25
AAAATA	TATTTT	2.81969e-28	1.77726e-26	5.86e-25
TTTAAA	TTTAAA	3.01873e-27	1.84675e-25	6.28e-24
CGTGTC	GACACG	4.71115e-27	2.79977e-25	9.8e-24
TTAAAA	TTTTAA	1.33049e-26	7.68728e-25	2.77e-23
CAATTA	TAATTG	1.72562e-26	9.70079e-25	3.59e-23
ACTATA	TATAGT	2.45252e-26	1.34243e-24	5.1e-23
ACGTAA	TTACGT	1.75616e-24	9.36617e-23	3.65e-21
CACACG	CGTGTG	5.7455e-24	2.98766e-22	1.2e-20
GTACTA	TAGTAC	6.27181e-24	3.1818e-22	1.3e-20
AATATC	GATATT	9.68369e-24	4.79573e-22	2.01e-20
CACGCG	CGCGTG	2.35305e-23	1.13822e-21	4.89e-20
AAATTT	AAATTT	6.16123e-23	2.91258e-21	1.28e-19
AATAGT	ACTATT	1.54816e-22	7.15595e-21	3.22e-19
AAATAT	ATATTT	2.05605e-22	9.2969e-21	4.28e-19
CGTGGC	GCCACG	2.41906e-22	1.07056e-20	5.03e-19
ATTACG	CGTAAT	4.2427e-22	1.83851e-20	8.82e-19
TACGTA	TACGTA	6.97399e-22	2.96039e-20	1.45e-18
ACGCGC	GCGCGT	2.57414e-21	1.07084e-19	5.35e-18
AGTATA	TATACT	3.26832e-21	1.33296e-19	6.8e-18
AATTAG	CTAATT	6.25752e-21	2.50301e-19	1.3e-17
CGTATA	TATACG	8.00508e-21	3.14162e-19	1.67e-17
AATAAA	TTTATT	9.4165e-21	3.62709e-19	1.96e-17
CATTAA	TTAATG	1.48835e-20	5.62866e-19	3.1e-17
GATATA	TATATC	1.53857e-20	5.71467e-19	3.2e-17
AATTTA	TAAATT	1.64599e-20	5.97355e-19	3.42e-17
ATACTA	TAGTAT	1.6657e-20	5.97355e-19	3.46e-17
ACTAAT	ATTAGT	2.28987e-20	8.07275e-19	4.76e-17
ATATTC	GAATAT	5.14037e-20	1.78199e-18	1.07e-16
TATAAA	TTTATA	2.10573e-19	7.18019e-18	4.38e-16
ATAGTA	TACTAT	4.90463e-19	1.64543e-17	1.02e-15
CGCGTA	TACGCG	1.78585e-18	5.89613e-17	3.71e-15
CAAATA	TATTTG	1.90073e-18	6.17737e-17	3.95e-15
CATAAA	TTTATG	2.07478e-18	6.59834e-17	4.32e-15
AATATG	CATATT	2.0937e-18	6.59834e-17	4.35e-15
ACCGAC	GTCGGT	7.40637e-18	2.29929e-16	1.54e-14
CTAATA	TATTAG	1.57866e-17	4.82886e-16	3.28e-14
AATACT	AGTATT	1.84149e-17	5.55116e-16	3.83e-14
ACGTTA	TAACGT	3.61214e-17	1.07332e-15	7.51e-14
AATTGT	ACAATT	6.69268e-17	1.96067e-15	1.39e-13
AAAAAC	GTTTTT	1.13178e-16	3.24352e-15	2.35e-13
GAATAA	TTATTC	1.13835e-16	3.24352e-15	2.37e-13
ACATTA	TAATGT	1.63552e-16	4.59712e-15	3.4e-13
AATACA	TGTATT	1.93446e-16	5.3649e-15	4.02e-13
AAAATT	AATTTT	2.40862e-16	6.59203e-15	5.01e-13
GTTATA	TATAAC	3.14753e-16	8.50243e-15	6.55e-13
ACAAAT	ATTTGT	5.12803e-16	1.36747e-14	1.07e-12
TAAAAA	TTTTTA	5.82846e-16	1.53458e-14	1.21e-12
TACATA	TATGTA	8.076e-16	2.09976e-14	1.68e-12
ATGTTA	TAACAT	1.00796e-15	2.58834e-14	2.1e-12
CATTTA	TAAATG	1.11809e-15	2.83614e-14	2.33e-12
CATATA	TATATG	1.22123e-15	3.06044e-14	2.54e-12
ATAATC	GATTAT	1.78327e-15	4.41571e-14	3.71e-12
ATTTTG	CAAAAT	2.55007e-15	6.24017e-14	5.3e-12
ACTAAA	TTTAGT	3.82553e-15	9.25245e-14	7.96e-12
TATTCA	TGAATA	6.34044e-15	1.51587e-13	1.32e-11
AATTTG	CAAATT	7.13907e-15	1.68742e-13	1.48e-11
CCCCAC	GTGGGG	7.66379e-15	1.79109e-13	1.59e-11
ACGCGG	CCGCGT	9.72342e-15	2.24719e-13	2.02e-11
ATATCC	GGATAT	1.00221e-14	2.29076e-13	2.08e-11
ATCATA	TATGAT	1.05106e-14	2.3763e-13	2.19e-11
CGTGGA	TCCACG	1.34374e-14	3.00536e-13	2.79e-11
CCGACA	TGTCGG	1.56485e-14	3.46264e-13	3.25e-11
ATTATG	CATAAT	1.66895e-14	3.65413e-13	3.47e-11
AAAGTT	AACTTT	5.10907e-14	1.10697e-12	<1E-10
ACTTAA	TTAAGT	7.59186e-14	1.62795e-12	<1E-10
AAAAAT	ATTTTT	1.19873e-13	2.54425e-12	<1E-10
GCCGAC	GTCGGC	1.55235e-13	3.2615e-12	<1E-10
GGATAA	TTATCC	2.37761e-13	4.94543e-12	<1E-10
CAACTA	TAGTTG	2.97847e-13	6.13388e-12	<1E-10
ATATAC	GTATAT	3.74013e-13	7.62693e-12	<1E-10
AGATAT	ATATCT	4.75361e-13	9.59953e-12	<1E-10
ATTTAG	CTAAAT	4.89665e-13	9.79331e-12	<1E-10
TATCCA	TGGATA	5.29948e-13	1.04051e-11	<1E-10
AAAAGT	ACTTTT	5.3026e-13	1.04051e-11	<1E-10
ACATAT	ATATGT	5.38868e-13	1.04752e-11	<1E-10
GGACCC	GGGTCC	5.71251e-13	1.10019e-11	<1E-10
GTCAAC	GTTGAC	6.67784e-13	1.2743e-11	<1E-10
TAATCA	TGATTA	7.51132e-13	1.42032e-11	<1E-10
GTAGTA	TACTAC	8.50552e-13	1.59383e-11	<1E-10
ATAATG	CATTAT	8.62327e-13	1.60146e-11	<1E-10
AAATAC	GTATTT	1.16031e-12	2.13579e-11	<1E-10
TATCAA	TTGATA	1.24571e-12	2.27287e-11	<1E-10
AATGTA	TACATT	1.35296e-12	2.44709e-11	<1E-10
CGCGTC	GACGCG	1.59876e-12	2.86673e-11	<1E-10
AAATTG	CAATTT	1.68016e-12	2.98696e-11	<1E-10
ATAACA	TGTTAT	2.21607e-12	3.90629e-11	<1E-10
TGTCAA	TTGACA	2.3642e-12	4.13239e-11	<1E-10
GTCACA	TGTGAC	3.81357e-12	6.61018e-11	<1E-10
ATAAAA	TTTTAT	4.21516e-12	7.2459e-11	<1E-10
AAAAAA	TTTTTT	4.34819e-12	7.4133e-11	<1E-10
GTCCAC	GTGGAC	4.39678e-12	7.4352e-11	<1E-10
AAAGTA	TACTTT	4.80199e-12	8.05495e-11	<1E-10
AGAAAA	TTTTCT	5.21406e-12	8.67619e-11	<1E-10
TCAAAA	TTTTGA	5.54706e-12	9.15705e-11	<1E-10
$down
k-mer	k-mer (reverse)	MetaPvalue	PBH	Pbonferroni
CTCAGC	GCTGAG	3.66432e-19	7.62179e-16	7.62179e-16
CCTGCA	TGCAGG	4.46353e-18	4.5908e-15	9.28415e-15
CTGCAA	TTGCAG	6.62134e-18	4.5908e-15	1.37724e-14
CTGAGA	TCTCAG	1.44913e-16	7.53546e-14	3.01418e-13
AGCTGA	TCAGCT	2.57803e-16	1.07246e-13	5.3623e-13
AAGCTG	CAGCTT	5.27868e-16	1.82994e-13	1.09796e-12
CAGAAG	CTTCTG	6.28776e-16	1.86836e-13	1.30785e-12
GCCACC	GGTGGC	1.13839e-14	2.9598e-12	2.36784e-11
ATCCGA	TCGGAT	2.62835e-14	6.0744e-12	5.46696e-11
CAGCTC	GAGCTG	3.81019e-14	7.9252e-12	7.9252e-11
CTGCGA	TCGCAG	6.56609e-14	1.24159e-11	<1E-10
GACGGA	TCCGTC	1.54962e-13	2.686e-11	<1E-10
AAAGCC	GGCTTT	2.24002e-13	3.58403e-11	<1E-10
AGGAGG	CCTCCT	2.79679e-13	4.15523e-11	<1E-10

## Sheet: septamers_noFC
$up
k-mer	k-mer (reverse)	MetaPvalue	PBH	Pbonferroni
AACGCGT	ACGCGTT	4.90949e-80	4.02186e-76	4.02186e-76
AAAATAA	TTATTTT	5.98489e-69	2.45141e-65	4.90282e-65
AAATATC	GATATTT	3.2359e-64	8.83617e-61	2.65085e-60
AATAATA	TATTATT	1.46908e-62	3.00867e-59	1.20347e-58
TAATAAA	TTTATTA	2.32548e-62	3.81007e-59	1.90504e-58
TAAAATA	TATTTTA	4.31446e-62	5.89067e-59	3.5344e-58
ATAAAAT	ATTTTAT	4.0324e-61	4.71906e-58	3.30334e-57
AATTAAA	TTTAATT	6.76288e-60	6.92519e-57	5.54015e-56
AATTAAT	ATTAATT	3.89495e-58	3.54527e-55	3.19074e-54
AAATAAT	ATTATTT	8.27726e-58	6.78073e-55	6.78073e-54
AAATTAA	TTAATTT	2.58306e-56	1.92368e-53	2.11604e-52
AAATAAA	TTTATTT	6.87993e-55	4.6967e-52	5.63604e-51
ATAATAT	ATATTAT	2.00575e-54	1.26393e-51	1.64311e-50
TATAATA	TATTATA	1.28457e-52	7.51655e-50	1.05232e-48
TAAATAA	TTATTTA	1.34185e-50	7.32826e-48	1.09924e-46
TTAATAA	TTATTAA	2.83833e-49	1.45322e-46	2.32516e-45
AAAAATA	TATTTTT	4.45555e-49	2.14705e-46	3.64999e-45
CACGTGG	CCACGTG	6.49494e-49	2.95592e-46	5.32066e-45
ATTAAAT	ATTTAAT	9.91675e-49	4.27569e-46	8.1238e-45
ATAAATA	TATTTAT	1.68224e-48	6.89047e-46	1.37809e-44
ACACGTG	CACGTGT	1.994e-48	7.77851e-46	1.63349e-44
AATAAAT	ATTTATT	3.39951e-48	1.26585e-45	2.78488e-44
TAATTAA	TTAATTA	6.37313e-48	2.26994e-45	5.22087e-44
ATTTTAA	TTAAAAT	8.58814e-48	2.93142e-45	7.0354e-44
ACGTGGC	GCCACGT	1.11164e-47	3.64263e-45	9.10657e-44
TATTTAA	TTAAATA	3.06972e-47	9.66131e-45	2.51471e-43
AATAAAA	TTTTATT	3.18427e-47	9.66131e-45	2.60855e-43
ATATTTA	TAAATAT	4.99842e-47	1.46239e-44	4.09471e-43
ATTAAAA	TTTTAAT	7.47659e-46	2.11201e-43	6.12482e-42
ATAATAA	TTATTAT	6.51035e-45	1.77776e-42	5.33328e-41
AATAATT	AATTATT	1.48715e-43	3.9299e-41	1.21827e-39
AATATTA	TAATATT	3.00197e-43	7.68503e-41	2.45921e-39
ACGTGTC	GACACGT	2.51774e-42	6.2501e-40	2.06253e-38
AAAATTA	TAATTTT	7.58645e-42	1.82789e-39	6.21482e-38
TATTAAA	TTTAATA	1.37748e-41	3.22408e-39	1.12843e-37
AATTTAA	TTAAATT	1.79241e-41	4.07874e-39	1.46835e-37
ATTTTTA	TAAAAAT	2.94362e-41	6.51733e-39	2.41141e-37
ATTATTA	TAATAAT	4.95347e-41	1.06786e-38	4.05788e-37
AATTATA	TATAATT	5.91409e-41	1.24226e-38	4.84482e-37
TTAAAAA	TTTTTAA	8.92942e-41	1.82874e-38	7.31498e-37
ATAAAAA	TTTTTAT	1.95296e-40	3.9021e-38	1.59986e-36
AATTTTA	TAAAATT	2.47996e-40	4.83711e-38	2.03159e-36
TATATAA	TTATATA	4.07208e-40	7.75779e-38	3.33585e-36
ATATATA	TATATAT	5.13489e-40	9.56023e-38	4.2065e-36
TAAAAAA	TTTTTTA	4.95147e-39	9.01387e-37	4.05624e-35
ATATAAT	ATTATAT	1.14706e-38	2.04276e-36	9.3967e-35
AAATATT	AATATTT	1.23433e-38	2.15142e-36	1.01117e-34
ATTATAA	TTATAAT	3.67421e-38	6.27066e-36	3.00991e-34
ATTAATA	TATTAAT	8.13447e-38	1.35995e-35	6.66376e-34
TTTAAAA	TTTTAAA	8.70388e-38	1.42604e-35	7.13022e-34
TAATATA	TATATTA	2.10356e-37	3.3789e-35	1.72324e-33
ATTTAAA	TTTAAAT	3.57305e-37	5.62892e-35	2.92704e-33
TAAATTA	TAATTTA	4.32634e-37	6.68705e-35	3.54414e-33
AAATATA	TATATTT	1.85145e-36	2.80872e-34	1.51671e-32
TATAAAA	TTTTATA	3.87293e-36	5.76855e-34	3.1727e-32
AAAATAT	ATATTTT	4.91895e-36	7.19572e-34	4.0296e-32
AATATCT	AGATATT	9.11772e-36	1.31039e-33	7.46923e-32
AATATAT	ATATATT	1.02607e-35	1.44923e-33	8.40554e-32
ATAATTA	TAATTAT	2.33595e-35	3.24341e-33	1.91361e-31
ACGCGTA	TACGCGT	3.44177e-33	4.69917e-31	2.8195e-29
AAAAAAA	TTTTTTT	4.58013e-33	6.15089e-31	3.75205e-29
AATTTAT	ATAAATT	7.93638e-33	1.04863e-30	6.50148e-29
CAAAATA	TATTTTG	1.41269e-32	1.83694e-30	1.15727e-28
AATACTA	TAGTATT	1.98519e-32	2.54104e-30	1.62627e-28
ACAAAAA	TTTTTGT	2.0209e-32	2.54696e-30	1.65553e-28
ATATTAA	TTAATAT	2.06593e-32	2.56425e-30	1.69241e-28
TTATAAA	TTTATAA	4.59545e-32	5.6188e-30	3.76459e-28
AAAAAAG	CTTTTTT	6.26994e-32	7.55343e-30	5.13633e-28
AATTAGT	ACTAATT	6.43249e-32	7.63695e-30	5.2695e-28
CGCGTTA	TAACGCG	1.76732e-30	2.06827e-28	1.44778e-26
ATATTTG	CAAATAT	1.28047e-29	1.47741e-27	1.04896e-25
TAGAAAA	TTTTCTA	4.7616e-29	5.41765e-27	3.9007e-25
CAAAAAA	TTTTTTG	2.4859e-28	2.78966e-26	2.03645e-24
CAAATTA	TAATTTG	3.35541e-28	3.71453e-26	2.74875e-24
ATTATTG	CAATAAT	6.56484e-28	7.17055e-26	5.37791e-24
AAAAAAT	ATTTTTT	8.29895e-28	8.94539e-26	6.7985e-24
AAATAGT	ACTATTT	5.69185e-27	6.05553e-25	4.66276e-23
ACGTGTG	CACACGT	1.99273e-26	2.09288e-24	1.63245e-22
AAAATTT	AAATTTT	2.86497e-26	2.97086e-24	2.34698e-22
ATATAAA	TTTATAT	5.45422e-26	5.58512e-24	4.4681e-22
ATAATTG	CAATTAT	6.59153e-26	6.60901e-24	5.39978e-22
ATATCTA	TAGATAT	6.61547e-26	6.60901e-24	5.41939e-22
ACAAATA	TATTTGT	1.41477e-25	1.39636e-23	1.15898e-21
AAATTTA	TAAATTT	1.85457e-25	1.80865e-23	1.51926e-21
AAATTAT	ATAATTT	2.19874e-25	2.11907e-23	1.80121e-21
AGAAAAA	TTTTTCT	9.25016e-25	8.81131e-23	7.57773e-21
TATAACA	TGTTATA	2.52423e-24	2.37684e-22	2.06785e-20
GAAAATA	TATTTTC	4.56783e-24	4.25223e-22	3.74197e-20
TAATTGA	TCAATTA	4.80239e-24	4.42036e-22	3.93412e-20
CAAATAA	TTATTTG	5.36722e-24	4.88536e-22	4.39683e-20
AAACGCG	CGCGTTT	6.98001e-24	6.28354e-22	5.71802e-20
AATATAA	TTATATT	1.45119e-23	1.29219e-21	1.18881e-19
ACACGTA	TACGTGT	1.78583e-23	1.57307e-21	1.46295e-19
ACATTAA	TTAATGT	1.8725e-23	1.63186e-21	1.53395e-19
AATATTC	GAATATT	2.92422e-23	2.52161e-21	2.39552e-19
CGTGGCA	TGCCACG	8.93617e-23	7.62554e-21	7.32051e-19
AAAAAAC	GTTTTTT	1.80857e-22	1.5274e-20	1.48158e-18
AAAAATT	AATTTTT	3.67998e-22	3.07616e-20	3.01464e-18
ACTAATA	TATTAGT	4.13427e-22	3.42101e-20	3.3868e-18
ATAATAC	GTATTAT	4.53252e-22	3.71304e-20	3.71304e-18
GTATTAA	TTAATAC	9.86039e-22	7.96853e-20	8.07763e-18
GAAATAA	TTATTTC	9.92175e-22	7.96853e-20	8.1279e-18
ATTTATG	CATAAAT	1.44607e-21	1.15012e-19	1.18462e-17
ACAATTA	TAATTGT	2.47491e-21	1.94947e-19	2.02745e-17
ACGCGCT	AGCGCGT	2.78186e-21	2.17038e-19	2.2789e-17
AAAAAGT	ACTTTTT	2.82458e-21	2.18292e-19	2.3139e-17
AACACGT	ACGTGTT	3.25552e-21	2.49245e-19	2.66692e-17
TATCTAA	TTAGATA	4.04225e-21	3.06612e-19	3.31141e-17
ACATAAA	TTTATGT	4.17564e-21	3.13824e-19	3.42069e-17
GTACTAA	TTAGTAC	5.1668e-21	3.84785e-19	4.23264e-17
GGGACCC	GGGTCCC	5.26279e-21	3.88403e-19	4.31127e-17
CCACGCG	CGCGTGG	9.61045e-21	7.02936e-19	7.87288e-17
AAGAAAA	TTTTCTT	1.20459e-20	8.7125e-19	9.86803e-17
AATATAC	GTATATT	1.21243e-20	8.7125e-19	9.93225e-17
ATATATG	CATATAT	1.24195e-20	8.84702e-19	1.01741e-16
CAATTTA	TAAATTG	1.99294e-20	1.40743e-18	1.63261e-16
ACGTATA	TATACGT	2.09999e-20	1.47035e-18	1.72031e-16
AATTATG	CATAATT	2.63711e-20	1.82652e-18	2.16033e-16
ACGCGTG	CACGCGT	2.65328e-20	1.82652e-18	2.17357e-16
AAAAGTC	GACTTTT	3.19626e-20	2.18198e-18	2.61838e-16
ATACTAT	ATAGTAT	3.48029e-20	2.35624e-18	2.85106e-16
AAAAACA	TGTTTTT	3.51591e-20	2.36085e-18	2.88023e-16
AATAATG	CATTATT	4.50822e-20	3.00255e-18	3.69313e-16
CTATTTA	TAAATAG	4.66957e-20	3.08493e-18	3.82531e-16
CGTGTCA	TGACACG	5.25375e-20	3.4431e-18	4.30387e-16
AAAATAC	GTATTTT	9.17209e-20	5.96332e-18	7.51378e-16
ACTACTA	TAGTAGT	1.03819e-19	6.69674e-18	8.50486e-16
AAAGAAA	TTTCTTT	1.96809e-19	1.2543e-17	1.61226e-15
ACGTGGA	TCCACGT	1.97516e-19	1.2543e-17	1.61805e-15
GACCGAC	GTCGGTC	3.27009e-19	2.06066e-17	2.67886e-15
AGAAAAT	ATTTTCT	8.27301e-19	5.17348e-17	6.77725e-15
AAAACAT	ATGTTTT	9.21747e-19	5.72042e-17	7.55095e-15
ACTAAAA	TTTTAGT	1.13807e-18	7.00983e-17	9.32308e-15
ACGCGTC	GACGCGT	1.20854e-18	7.38835e-17	9.90039e-15
AACAAAT	ATTTGTT	1.58603e-18	9.62424e-17	1.29927e-14
ATACGTG	CACGTAT	1.65143e-18	9.89716e-17	1.35285e-14
ACAAAAT	ATTTTGT	1.65517e-18	9.89716e-17	1.35591e-14
GATATTA	TAATATC	1.80291e-18	1.07025e-16	1.47694e-14
CATTTTA	TAAAATG	1.8453e-18	1.08753e-16	1.51167e-14
AAATGAA	TTCATTT	1.97986e-18	1.1585e-16	1.6219e-14
ATATGTA	TACATAT	2.03341e-18	1.1814e-16	1.66577e-14
AATTTTG	CAAAATT	2.20756e-18	1.27354e-16	1.80843e-14
AAATTAG	CTAATTT	2.25891e-18	1.29406e-16	1.8505e-14
CTTTTTA	TAAAAAG	2.68786e-18	1.52909e-16	2.2019e-14
AAAAGAA	TTCTTTT	3.01956e-18	1.70595e-16	2.47362e-14
ACTATTA	TAATAGT	3.82429e-18	2.14579e-16	3.13286e-14
CCACGTA	TACGTGG	4.8684e-18	2.71306e-16	3.98819e-14
CGCGTAA	TTACGCG	6.84634e-18	3.78954e-16	5.60852e-14
GAAAAAA	TTTTTTC	6.93187e-18	3.81114e-16	5.67859e-14
AAAAAGA	TCTTTTT	7.05062e-18	3.85058e-16	5.77587e-14
GACAAAA	TTTTGTC	8.24528e-18	4.4732e-16	6.75454e-14
ATAAAAC	GTTTTAT	8.33888e-18	4.49422e-16	6.83121e-14
ATATTCA	TGAATAT	8.62202e-18	4.61645e-16	7.06316e-14
AAATATG	CATATTT	1.42326e-17	7.57101e-16	1.16594e-13
ACCACGT	ACGTGGT	1.4607e-17	7.72003e-16	1.1966e-13
CACGCGC	GCGCGTG	1.99633e-17	1.04833e-15	1.6354e-13
ATATTAC	GTAATAT	2.02741e-17	1.05787e-15	1.66085e-13
TAATACA	TGTATTA	2.22082e-17	1.15146e-15	1.8193e-13
GTAAATA	TATTTAC	2.40912e-17	1.24123e-15	1.97355e-13
AATATCC	GGATATT	2.76767e-17	1.41705e-15	2.26728e-13
AAATTGT	ACAATTT	2.81083e-17	1.43021e-15	2.30263e-13
GTTATAA	TTATAAC	3.28913e-17	1.66325e-15	2.69446e-13
AAATTAC	GTAATTT	3.72341e-17	1.8713e-15	3.05022e-13
ACGTGTA	TACACGT	3.89298e-17	1.94459e-15	3.18913e-13
ACGTATG	CATACGT	5.53271e-17	2.74691e-15	4.53239e-13
ATACGTA	TACGTAT	8.49047e-17	4.18999e-15	6.95539e-13
AAAGTTA	TAACTTT	1.25035e-16	6.13345e-15	1.02429e-12
TGATTAA	TTAATCA	1.72082e-16	8.39102e-15	1.40969e-12
TACTATA	TATAGTA	1.77682e-16	8.61286e-15	1.45557e-12
AACATAT	ATATGTT	2.1083e-16	1.01595e-14	1.72712e-12
ATATATC	GATATAT	2.26361e-16	1.08441e-14	1.85435e-12
CACGTAA	TTACGTG	2.35138e-16	1.11991e-14	1.92625e-12
CTAAATA	TATTTAG	2.42063e-16	1.14623e-14	1.98298e-12
AACTATT	AATAGTT	2.68799e-16	1.26552e-14	2.202e-12
CAATTAA	TTAATTG	4.02246e-16	1.88297e-14	3.2952e-12
ACTATAG	CTATAGT	4.54516e-16	2.11556e-14	3.72339e-12
ATTTTTC	GAAAAAT	4.82617e-16	2.23367e-14	3.9536e-12
CATAAAA	TTTTATG	4.85766e-16	2.23562e-14	3.97939e-12
GTCAAAA	TTTTGAC	4.97341e-16	2.2761e-14	4.07422e-12
AAAATAG	CTATTTT	8.5441e-16	3.88851e-14	6.99932e-12
AGAATAT	ATATTCT	1.19261e-15	5.39772e-14	9.76988e-12
CAATAAA	TTTATTG	1.27813e-15	5.75298e-14	1.04704e-11
GGACCCA	TGGGTCC	1.36057e-15	6.0906e-14	1.11458e-11
GTTTTTA	TAAAAAC	1.58669e-15	7.06424e-14	1.29982e-11
ACCCCAC	GTGGGGT	1.81475e-15	8.0359e-14	1.48664e-11
TAAACTA	TAGTTTA	1.97326e-15	8.69082e-14	1.61649e-11
CTAATTA	TAATTAG	1.99948e-15	8.75923e-14	1.63798e-11
AACTATA	TATAGTT	3.01421e-15	1.31342e-13	2.46924e-11
AAAAACG	CGTTTTT	3.0529e-15	1.32064e-13	2.50094e-11
AAAACTA	TAGTTTT	3.06301e-15	1.32064e-13	2.50922e-11
AAAAATG	CATTTTT	3.14273e-15	1.34792e-13	2.57452e-11
AGTATTA	TAATACT	3.44384e-15	1.46937e-13	2.82119e-11
ATTTATA	TATAAAT	3.58521e-15	1.52176e-13	2.937e-11
ATTATTC	GAATAAT	3.78496e-15	1.59827e-13	3.10064e-11
ATAAAGA	TCTTTAT	4.84329e-15	2.03468e-13	3.96762e-11
CTAAAAA	TTTTTAG	4.91008e-15	2.05221e-13	4.02234e-11
TAGTATA	TATACTA	5.41895e-15	2.2534e-13	4.43921e-11
AATGAAT	ATTCATT	5.9876e-15	2.47729e-13	4.90504e-11
ACTAAAT	ATTTAGT	6.76692e-15	2.78566e-13	5.54346e-11
GTGGATA	TATCCAC	7.08934e-15	2.90379e-13	5.80758e-11
AAACATT	AATGTTT	8.26394e-15	3.36807e-13	6.76982e-11
ACTTTTA	TAAAAGT	8.9681e-15	3.63697e-13	7.34667e-11
AAAAGTT	AACTTTT	1.07337e-14	4.33154e-13	8.79303e-11
ACTATAA	TTATAGT	1.16917e-14	4.67405e-13	9.57786e-11
CATATTA	TAATATG	1.16965e-14	4.67405e-13	9.5818e-11
AAAACAA	TTGTTTT	1.72751e-14	6.86977e-13	<1E-10
AATTTGT	ACAAATT	2.47874e-14	9.80957e-13	<1E-10
AATAAAG	CTTTATT	2.62819e-14	1.0351e-12	<1E-10
GAATATA	TATATTC	3.51366e-14	1.37722e-12	<1E-10
ATATACG	CGTATAT	4.34687e-14	1.69569e-12	<1E-10
ACCGACA	TGTCGGT	4.55997e-14	1.77039e-12	<1E-10
AACTAAT	ATTAGTT	4.65735e-14	1.79151e-12	<1E-10
ATTTTTG	CAAAAAT	4.6581e-14	1.79151e-12	<1E-10
ATTAATG	CATTAAT	4.68647e-14	1.794e-12	<1E-10
GTGATAA	TTATCAC	4.92721e-14	1.87738e-12	<1E-10
AAAAACT	AGTTTTT	5.17447e-14	1.96247e-12	<1E-10
GGTCCCA	TGGGACC	5.70606e-14	2.1541e-12	<1E-10
CTTTTAA	TTAAAAG	8.31656e-14	3.12519e-12	<1E-10
AATACGT	ACGTATT	8.41793e-14	3.14884e-12	<1E-10
AACAAAA	TTTTGTT	9.93756e-14	3.70039e-12	<1E-10
AAACTAT	ATAGTTT	9.99395e-14	3.70454e-12	<1E-10
AATATGT	ACATATT	1.08429e-13	4.00111e-12	<1E-10
AGTACTA	TAGTACT	1.1406e-13	4.19004e-12	<1E-10
ATTAGTA	TACTAAT	1.51287e-13	5.53278e-12	<1E-10
AATAGTA	TACTATT	1.72619e-13	6.28486e-12	<1E-10
AATTAAC	GTTAATT	1.99908e-13	7.24622e-12	<1E-10
GATAATA	TATTATC	2.03379e-13	7.33754e-12	<1E-10
AATTTTC	GAAAATT	2.04219e-13	7.33754e-12	<1E-10
TATTTGA	TCAAATA	2.30693e-13	8.25255e-12	<1E-10
AAAAGTA	TACTTTT	2.71261e-13	9.66161e-12	<1E-10
AATACAT	ATGTATT	2.91232e-13	1.0328e-11	<1E-10
ATTACGA	TCGTAAT	3.15734e-13	1.11487e-11	<1E-10
ATACAAA	TTTGTAT	3.28573e-13	1.15522e-11	<1E-10
CGTAATA	TATTACG	3.71053e-13	1.299e-11	<1E-10
CGACACG	CGTGTCG	4.1366e-13	1.442e-11	<1E-10
CGCGTGA	TCACGCG	4.53831e-13	1.57533e-11	<1E-10
TATTTCA	TGAAATA	4.58062e-13	1.58331e-11	<1E-10
AAAATTG	CAATTTT	5.13649e-13	1.76799e-11	<1E-10
AAATTGA	TCAATTT	6.7501e-13	2.31368e-11	<1E-10
TGGTCAA	TTGACCA	8.08077e-13	2.75824e-11	<1E-10
TATGTAA	TTACATA	8.11483e-13	2.75837e-11	<1E-10
AAAAAGG	CCTTTTT	8.27472e-13	2.8011e-11	<1E-10
ATAATAG	CTATTAT	8.3407e-13	2.81181e-11	<1E-10
GTCGACA	TGTCGAC	8.67556e-13	2.91271e-11	<1E-10
ATAAAAG	CTTTTAT	9.51486e-13	3.17132e-11	<1E-10
GTTAAAA	TTTTAAC	9.52324e-13	3.17132e-11	<1E-10
TAAAACA	TGTTTTA	1.02242e-12	3.39097e-11	<1E-10
CCACGTC	GACGTGG	1.052e-12	3.475e-11	<1E-10
CTAATAA	TTATTAG	1.25051e-12	4.11411e-11	<1E-10
AATAAAC	GTTTATT	1.32925e-12	4.35567e-11	<1E-10
TAAAGTA	TACTTTA	1.51493e-12	4.94436e-11	<1E-10
GATTATA	TATAATC	1.63554e-12	5.31679e-11	<1E-10
ACCGCGT	ACGCGGT	1.77603e-12	5.75068e-11	<1E-10
TGGATAA	TTATCCA	2.13483e-12	6.88524e-11	<1E-10
ATATGAT	ATCATAT	2.17565e-12	6.98937e-11	<1E-10
ACAATAA	TTATTGT	2.50594e-12	8.019e-11	<1E-10
AATTACG	CGTAATT	2.66167e-12	8.48419e-11	<1E-10
ACGTTAA	TTAACGT	2.6736e-12	8.48921e-11	<1E-10
AATTAGA	TCTAATT	2.72018e-12	8.60373e-11	<1E-10
AAGATAT	ATATCTT	2.75815e-12	8.69029e-11	<1E-10
AGTTTAT	ATAAACT	2.89687e-12	9.0924e-11	<1E-10
$down
k-mer	k-mer (reverse)	MetaPvalue	PBH	Pbonferroni
CTTCTTC	GAAGAAG	2.46524e-16	2.01952e-12	2.01952e-12

## Sheet: octamers_noFC
$up
k-mer	k-mer (reverse)	MetaPvalue	PBH	Pbonferroni
AAATATCT	AGATATTT	5.7442e-63	1.88961e-58	1.88961e-58
AAAATAAA	TTTATTTT	2.4932e-62	4.10081e-58	8.20162e-58
ATAAAATA	TATTTTAT	5.88221e-58	6.45003e-54	1.93501e-53
AAAATATC	GATATTTT	2.34912e-54	1.93192e-50	7.72768e-50
TAAAATAA	TTATTTTA	4.56308e-54	3.00214e-50	1.50107e-49
AAATAAAA	TTTTATTT	7.71061e-52	4.22747e-48	2.53648e-47
AAACGCGT	ACGCGTTT	2.55967e-49	1.2029e-45	8.42029e-45
AAAAATAA	TTATTTTT	8.35908e-45	3.43725e-41	2.7498e-40
AATAAAAA	TTTTTATT	1.45923e-44	5.33366e-41	4.8003e-40
AATAATAT	ATATTATT	7.56395e-44	2.41059e-40	2.48824e-39
AAAAAAAA	TTTTTTTT	8.06071e-44	2.41059e-40	2.65165e-39
AATTAAAA	TTTTAATT	4.84825e-43	1.28217e-39	1.59488e-38
TAATTAAA	TTTAATTA	5.06696e-43	1.28217e-39	1.66683e-38
AAATAATA	TATTATTT	1.52455e-42	3.15288e-39	5.01515e-38
AAATAATT	AATTATTT	1.54647e-42	3.15288e-39	5.08726e-38
AAAATAAT	ATTATTTT	1.56624e-42	3.15288e-39	5.1523e-38
AATAAAAT	ATTTTATT	1.62934e-42	3.15288e-39	5.35989e-38
ACACGTGG	CCACGTGT	2.461e-40	4.32611e-37	8.0957e-36
CACGTGTC	GACACGTG	2.49866e-40	4.32611e-37	8.2196e-36
AATAAATA	TATTTATT	3.48582e-40	5.73347e-37	1.14669e-35
TAAAAAAA	TTTTTTTA	1.80353e-39	2.82518e-36	5.93288e-35
ATATATAA	TTATATAT	1.25982e-38	1.88377e-35	4.1443e-34
ATAATAAA	TTTATTAT	1.53784e-38	2.19951e-35	5.05888e-34
TAATAATA	TATTATTA	1.84035e-38	2.5225e-35	6.054e-34
AAATAAAT	ATTTATTT	3.1654e-38	4.16517e-35	1.04129e-33
ACAAAAAA	TTTTTTGT	2.28582e-37	2.89209e-34	7.51942e-33
TAATAAAA	TTTTATTA	1.03641e-36	1.26274e-33	3.40939e-32
AATAATAA	TTATTATT	2.07376e-36	2.43637e-33	6.82183e-32
AAAAAAAG	CTTTTTTT	5.26822e-35	5.97597e-32	1.73303e-30
ATTAAAAA	TTTTTAAT	7.23743e-35	7.93608e-32	2.38082e-30
CACGTGGC	GCCACGTG	2.29902e-34	2.43963e-31	7.56286e-30
TTAATAAA	TTTATTAA	7.31743e-34	7.52232e-31	2.40714e-29
ATAAAAAA	TTTTTTAT	2.54396e-33	2.53595e-30	8.36862e-29
TAAATAAA	TTTATTTA	9.0639e-33	8.76959e-30	2.98166e-28
ACGCGTTA	TAACGCGT	1.07957e-32	1.01467e-29	3.55135e-28
ATAATATA	TATATTAT	3.31002e-32	3.02463e-29	1.08887e-27
CAAAAAAA	TTTTTTTG	5.37713e-32	4.7807e-29	1.76886e-27
AAATTAAT	ATTAATTT	5.81972e-32	4.92108e-29	1.91445e-27
ATTTATTA	TAATAAAT	5.8342e-32	4.92108e-29	1.91922e-27
ATAATTAA	TTAATTAT	6.72505e-32	5.53068e-29	2.21227e-27
TATAATAA	TTATTATA	1.87729e-31	1.50623e-28	6.17553e-27
ACGTGGCA	TGCCACGT	1.92898e-31	1.51085e-28	6.34556e-27
ATTAAAAT	ATTTTAAT	3.95558e-31	2.97187e-28	1.30123e-26
AAAAAATA	TATTTTTT	3.97502e-31	2.97187e-28	1.30762e-26
ATTATTTA	TAAATAAT	6.60366e-31	4.82742e-28	2.17234e-26
ATTAATTA	TAATTAAT	7.17282e-31	5.1295e-28	2.35957e-26
AATATTAT	ATAATATT	1.17867e-30	8.24967e-28	3.87734e-26
ATAAATAT	ATATTTAT	1.56279e-30	1.07103e-27	5.14097e-26
TAAAAATA	TATTTTTA	2.42958e-30	1.63109e-27	7.99233e-26
TATAAAAA	TTTTTATA	4.57803e-30	3.01197e-27	1.50599e-25
AATTAATT	AATTAATT	4.97865e-30	3.2022e-27	1.63778e-25
TTATTAAA	TTTAATAA	5.06185e-30	3.2022e-27	1.66515e-25
AATAATTA	TAATTATT	6.02195e-30	3.7377e-27	1.98098e-25
ATAATAAT	ATTATTAT	1.24202e-29	7.56621e-27	4.08575e-25
AAAAATAT	ATATTTTT	1.53392e-29	9.125e-27	5.04598e-25
AAAATTAA	TTAATTTT	1.56941e-29	9.125e-27	5.16273e-25
AAAAAAAT	ATTTTTTT	1.58112e-29	9.125e-27	5.20125e-25
TTTAAAAA	TTTTTAAA	1.90258e-29	1.07909e-26	6.25872e-25
TTATAAAA	TTTTATAA	2.15437e-29	1.20119e-26	7.08701e-25
AAATTAAA	TTTAATTT	2.38329e-29	1.30668e-26	7.84005e-25
ATTTAAAA	TTTTAAAT	2.63018e-29	1.4184e-26	8.65225e-25
ATTTTTAA	TTAAAAAT	2.92235e-29	1.55054e-26	9.61338e-25
TATTTAAA	TTTAAATA	4.78488e-29	2.49847e-26	1.57404e-24
AAAAGAAA	TTTCTTTT	5.40982e-29	2.78065e-26	1.77961e-24
ATATAATA	TATTATAT	1.57235e-28	7.95754e-26	5.1724e-24
AAATATTA	TAATATTT	3.57893e-28	1.78383e-25	1.17733e-23
AATATCTA	TAGATATT	4.40089e-28	2.16077e-25	1.44772e-23
AAAAAAAC	GTTTTTTT	5.2521e-28	2.54078e-25	1.72773e-23
TATTTTAA	TTAAAATA	7.51409e-28	3.58237e-25	2.47183e-23
ATTTTAAA	TTTAAAAT	9.30002e-28	4.37048e-25	3.05933e-23
AATTTAAT	ATTAAATT	1.37952e-27	6.39165e-25	4.53807e-23
TTAATTAA	TTAATTAA	1.90701e-27	8.71292e-25	6.2733e-23
TTAAAAAA	TTTTTTAA	9.35148e-27	4.21406e-24	3.07626e-22
ATATTATA	TATAATAT	1.20883e-26	5.37376e-24	3.97658e-22
ATTAATAA	TTATTAAT	1.6948e-26	7.43364e-24	5.57523e-22
ATAAAAAT	ATTTTTAT	1.79457e-26	7.76765e-24	5.90342e-22
ATTATAAA	TTTATAAT	2.76236e-26	1.18014e-23	9.08706e-22
GATATTTA	TAAATATC	4.37975e-26	1.84713e-23	1.44076e-21
AACGCGTT	AACGCGTT	6.05895e-26	2.52298e-23	1.99315e-21
AAAATATA	TATATTTT	7.42721e-26	3.05407e-23	2.44325e-21
AAATTTTA	TAAAATTT	1.1993e-25	4.87063e-23	3.94521e-21
ATATATTA	TAATATAT	1.62779e-25	6.53019e-23	5.35476e-21
AAAGAAAA	TTTTCTTT	2.31287e-25	9.16677e-23	7.60842e-21
ATTTTATA	TATAAAAT	3.30482e-25	1.29423e-22	1.08715e-20
ATATTTTA	TAAAATAT	3.40911e-25	1.31937e-22	1.12146e-20
ATTATATA	TATATAAT	3.54005e-25	1.35411e-22	1.16453e-20
AACGCGTA	TACGCGTT	7.52413e-25	2.84498e-22	2.47514e-20
AATTAAAT	ATTTAATT	1.62079e-24	6.05881e-22	5.33175e-20
AAAAAATT	AATTTTTT	2.7671e-24	1.02277e-21	9.10265e-20
TATTAAAA	TTTTAATA	2.8421e-24	1.03882e-21	9.34937e-20
AATTTAAA	TTTAAATT	3.34838e-24	1.21042e-21	1.10148e-19
TTAGAAAA	TTTTCTAA	3.86329e-24	1.38138e-21	1.27087e-19
AAGCGCGT	ACGCGCTT	3.97933e-24	1.40757e-21	1.30904e-19
AATATTAA	TTAATATT	5.98596e-24	2.09483e-21	1.96914e-19
AAATATGT	ACATATTT	6.69971e-24	2.31993e-21	2.20394e-19
AATTTTAT	ATAAAATT	1.43204e-23	4.90713e-21	4.71085e-19
ACGTGTCA	TGACACGT	1.71183e-23	5.80539e-21	5.63123e-19
CAAATAAA	TTTATTTG	1.73159e-23	5.81249e-21	5.69624e-19
ACAAATAT	ATATTTGT	1.93816e-23	6.44019e-21	6.37578e-19
AATTAATA	TATTAATT	3.34094e-23	1.09904e-20	1.09904e-18
ATTTAATA	TATTAAAT	3.83465e-23	1.24896e-20	1.26145e-18
AATTTTAA	TTAAAATT	5.55571e-23	1.79177e-20	1.82761e-18
ATATTTAA	TTAAATAT	1.86785e-22	5.96552e-20	6.14449e-18
TATTATAA	TTATAATA	2.46351e-22	7.79227e-20	8.10396e-18
AAGAAAAT	ATTTTCTT	2.49801e-22	7.82613e-20	8.21744e-18
CAAAATAA	TTATTTTG	3.5503e-22	1.1018e-19	1.1679e-17
AAACAAAT	ATTTGTTT	5.28102e-22	1.62359e-19	1.73724e-17
ACAAAATA	TATTTTGT	6.40034e-22	1.9495e-19	2.10546e-17
GAAAAAAA	TTTTTTTC	7.20431e-22	2.17425e-19	2.36993e-17
AATATATA	TATATATT	1.13179e-21	3.38468e-19	3.72314e-17
ACCACGTG	CACGTGGT	1.25172e-21	3.70959e-19	4.11765e-17
ACGTGTCG	CGACACGT	1.43963e-21	4.22841e-19	4.73582e-17
CAAAATTA	TAATTTTG	2.13535e-21	6.21634e-19	7.02446e-17
ATATTAAA	TTTAATAT	2.29229e-21	6.61468e-19	7.54073e-17
AAATATAC	GTATATTT	3.62167e-21	1.03599e-18	1.19139e-16
AAATGAAT	ATTCATTT	5.51607e-21	1.56428e-18	1.81457e-16
AAAATTAT	ATAATTTT	6.30057e-21	1.77148e-18	2.07264e-16
ATAATTTA	TAAATTAT	7.56559e-21	2.10913e-18	2.48878e-16
AGCGCGTG	CACGCGCT	8.32136e-21	2.30033e-18	2.7374e-16
AAACAAAA	TTTTGTTT	8.58367e-21	2.35307e-18	2.82368e-16
AAAAAGAA	TTCTTTTT	9.18466e-21	2.49701e-18	3.02139e-16
TAAAATGA	TCATTTTA	2.08275e-20	5.61591e-18	6.85141e-16
AAAACATT	AATGTTTT	2.37725e-20	6.35789e-18	7.82021e-16
AAAAAAGA	TCTTTTTT	2.78242e-20	7.38148e-18	9.15304e-16
TAGAAAAA	TTTTTCTA	3.29477e-20	8.67079e-18	1.08385e-15
GGGACCCA	TGGGTCCC	3.49824e-20	9.13318e-18	1.15078e-15
ATTATTAA	TTAATAAT	3.60624e-20	9.34102e-18	1.18631e-15
ATAAATAA	TTATTTAT	7.6702e-20	1.97124e-17	2.52319e-15
ATTAAATA	TATTTAAT	8.58366e-20	2.1889e-17	2.82368e-15
AATATTTA	TAAATATT	1.66302e-19	4.20821e-17	5.47067e-15
ATAATATC	GATATTAT	1.78432e-19	4.48067e-17	5.86968e-15
AATTTTCT	AGAAAATT	2.64401e-19	6.5892e-17	8.69774e-15
AACAAAAA	TTTTTGTT	2.76649e-19	6.84259e-17	9.10064e-15
AATTATAA	TTATAATT	2.94695e-19	7.23454e-17	9.69428e-15
TAATTATA	TATAATTA	3.77927e-19	9.20911e-17	1.24323e-14
AATAAAAC	GTTTTATT	3.99191e-19	9.65573e-17	1.31318e-14
ACAAATAA	TTATTTGT	4.18931e-19	1.00592e-16	1.37812e-14
GAAATAAA	TTTATTTC	4.6346e-19	1.10478e-16	1.5246e-14
AAGATATT	AATATCTT	4.93745e-19	1.16851e-16	1.62423e-14
AACCGCGT	ACGCGGTT	5.206e-19	1.22326e-16	1.71256e-14
ATATTTTC	GAAAATAT	6.12541e-19	1.42909e-16	2.01501e-14
ACACGTAT	ATACGTGT	6.93442e-19	1.60644e-16	2.28115e-14
ACTAATAA	TTATTAGT	8.97227e-19	2.064e-16	2.95152e-14
TAATTTAA	TTAAATTA	9.54934e-19	2.18149e-16	3.14135e-14
TAAATTAA	TTAATTTA	1.01222e-18	2.29642e-16	3.32981e-14
TACGTATA	TATACGTA	1.40423e-18	3.16394e-16	4.61936e-14
ATTTTTTA	TAAAAAAT	1.57879e-18	3.53306e-16	5.1936e-14
TAATACTA	TAGTATTA	1.60196e-18	3.56068e-16	5.26981e-14
AAATATCA	TGATATTT	1.79114e-18	3.95445e-16	5.89214e-14
TTAAATAA	TTATTTAA	2.70413e-18	5.91511e-16	8.89552e-14
AAAACAAA	TTTGTTTT	2.71517e-18	5.91511e-16	8.93181e-14
ATAAATTA	TAATTTAT	3.12043e-18	6.75328e-16	1.0265e-13
AATATTTG	CAAATATT	3.19335e-18	6.86592e-16	1.05048e-13
CAAAAATA	TATTTTTG	5.25441e-18	1.1224e-15	1.72849e-13
AAAAACAA	TTGTTTTT	6.22932e-18	1.32206e-15	2.0492e-13
AAATAAAG	CTTTATTT	6.37398e-18	1.34409e-15	2.09678e-13
ACACGTGT	ACACGTGT	7.19587e-18	1.50774e-15	2.36715e-13
ACTAATTA	TAATTAGT	1.30067e-17	2.70803e-15	4.27869e-13
CTAATAAA	TTTATTAG	1.35232e-17	2.79786e-15	4.44859e-13
GAATAATA	TATTATTC	1.3974e-17	2.87305e-15	4.59688e-13
TTTTAAAA	TTTTAAAA	1.58237e-17	3.23315e-15	5.20537e-13
ATAATTGA	TCAATTAT	2.04186e-17	4.14624e-15	6.71691e-13
AAAAAACA	TGTTTTTT	2.32938e-17	4.70106e-15	7.66273e-13
GTATTATA	TATAATAC	2.52606e-17	5.06691e-15	8.30974e-13
TAAAATTA	TAATTTTA	2.91158e-17	5.8048e-15	9.57793e-13
CAATAATA	TATTATTG	3.14809e-17	6.23853e-15	1.0356e-12
AAATTATT	AATAATTT	3.38209e-17	6.66211e-15	1.11257e-12
ACATAAAT	ATTTATGT	3.47218e-17	6.79887e-15	1.14221e-12
AAAAAACG	CGTTTTTT	4.29695e-17	8.36405e-15	1.41352e-12
TAATTTGA	TCAAATTA	5.60258e-17	1.08413e-14	1.84302e-12
AATAATGA	TCATTATT	6.0513e-17	1.16012e-14	1.99064e-12
AAGAAAAA	TTTTTCTT	6.06581e-17	1.16012e-14	1.99541e-12
AATATAAT	ATTATATT	6.10676e-17	1.1612e-14	2.00888e-12
AAAGCGCG	CGCGCTTT	7.22203e-17	1.36538e-14	2.37576e-12
GAAAATTA	TAATTTTC	8.04034e-17	1.5114e-14	2.64495e-12
TATCTTAA	TTAAGATA	9.62019e-17	1.7981e-14	3.16466e-12
CATTTTAA	TTAAAATG	9.70548e-17	1.8038e-14	3.19272e-12
AAAAAAGT	ACTTTTTT	1.00754e-16	1.86203e-14	3.31442e-12
GGGTCCCA	TGGGACCC	1.05678e-16	1.94211e-14	3.47638e-12
AATTTATA	TATAAATT	1.09104e-16	1.99394e-14	3.58909e-12
AAACTATT	AATAGTTT	1.27482e-16	2.31694e-14	4.19366e-12
AACATTAA	TTAATGTT	1.35399e-16	2.4473e-14	4.45409e-12
ACGCGTAA	TTACGCGT	1.45485e-16	2.61522e-14	4.78586e-12
AAAATTTA	TAAATTTT	1.51818e-16	2.71424e-14	4.9942e-12
ATATAAAA	TTTTATAT	1.65495e-16	2.94277e-14	5.44412e-12
ATACAAAT	ATTTGTAT	1.70876e-16	3.02211e-14	5.62113e-12
TAAATATA	TATATTTA	1.8262e-16	3.21254e-14	6.00746e-12
AAATATAT	ATATATTT	1.86224e-16	3.25852e-14	6.12603e-12
CAAATTAA	TTAATTTG	2.91133e-16	5.06725e-14	9.57709e-12
AAATTTAT	ATAAATTT	3.47201e-16	6.01133e-14	1.14215e-11
ATATTACG	CGTAATAT	4.03802e-16	6.9547e-14	1.32835e-11
GTGTTATA	TATAACAC	4.14252e-16	7.09752e-14	1.36272e-11
ATATATAT	ATATATAT	4.64236e-16	7.91271e-14	1.52715e-11
GTTTTTAA	TTAAAAAC	4.85918e-16	8.23957e-14	1.59848e-11
ACAATTAA	TTAATTGT	5.05116e-16	8.52117e-14	1.66163e-11
AACGCGTG	CACGCGTT	5.64035e-16	9.46659e-14	1.85545e-11
CGCGTGGA	TCCACGCG	5.72031e-16	9.55205e-14	1.88175e-11
ATATTTTG	CAAAATAT	6.67351e-16	1.10875e-13	2.19532e-11
AAATATCC	GGATATTT	8.43091e-16	1.39368e-13	2.77343e-11
TAATTGTA	TACAATTA	1.30213e-15	2.14175e-13	4.2835e-11
AAAAATTA	TAATTTTT	1.67824e-15	2.74664e-13	5.52075e-11
TAATATAA	TTATATTA	1.76257e-15	2.87038e-13	5.79816e-11
TAAGAAAA	TTTTCTTA	2.22568e-15	3.6067e-13	7.32161e-11
ATATCTAA	TTAGATAT	2.75682e-15	4.4455e-13	9.06882e-11
CCACGTCA	TGACGTGG	3.02135e-15	4.8483e-13	9.93903e-11
AAATTTAA	TTAAATTT	3.57576e-15	5.7101e-13	<1E-10
AATTATTG	CAATAATT	3.84022e-15	6.1028e-13	<1E-10
ATCAATTA	TAATTGAT	4.66672e-15	7.3806e-13	<1E-10
AATTATAT	ATATAATT	4.88381e-15	7.68698e-13	<1E-10
AATGAATA	TATTCATT	5.03141e-15	7.88159e-13	<1E-10
AAAAATTG	CAATTTTT	5.1585e-15	8.00447e-13	<1E-10
AATAATAG	CTATTATT	5.15852e-15	8.00447e-13	<1E-10
AAATATAA	TTATATTT	6.53352e-15	1.00904e-12	<1E-10
ACTATTTA	TAAATAGT	7.48729e-15	1.15094e-12	<1E-10
AAAACGCG	CGCGTTTT	9.49348e-15	1.45255e-12	<1E-10
ATATCTTA	TAAGATAT	9.6426e-15	1.46853e-12	<1E-10
AGAAAAAT	ATTTTTCT	9.99012e-15	1.51445e-12	<1E-10
CTAATTTA	TAAATTAG	1.02571e-14	1.54778e-12	<1E-10
AAATAATG	CATTATTT	1.11526e-14	1.67523e-12	<1E-10
CCACGTGG	CCACGTGG	1.14805e-14	1.71665e-12	<1E-10
AACTAATA	TATTAGTT	1.16367e-14	1.73214e-12	<1E-10
AATTAACA	TGTTAATT	1.201e-14	1.77964e-12	<1E-10
ATTATTTG	CAAATAAT	1.38724e-14	2.0464e-12	<1E-10
AAAATATT	AATATTTT	1.4495e-14	2.12869e-12	<1E-10
AACGCGTC	GACGCGTT	1.82722e-14	2.67148e-12	<1E-10
AAAAAATG	CATTTTTT	2.26352e-14	3.2846e-12	<1E-10
GATAAATA	TATTTATC	2.26655e-14	3.2846e-12	<1E-10
GTATTAAA	TTTAATAC	2.3561e-14	3.3994e-12	<1E-10
TAATATGA	TCATATTA	2.4807e-14	3.56353e-12	<1E-10
TATATATA	TATATATA	2.68199e-14	3.83594e-12	<1E-10
GTTATATA	TATATAAC	2.71268e-14	3.86305e-12	<1E-10
ACAAAAAT	ATTTTTGT	2.72859e-14	3.86896e-12	<1E-10
AATAAATT	AATTTATT	3.67093e-14	5.18278e-12	<1E-10
CACGTGGA	TCCACGTG	3.73674e-14	5.25315e-12	<1E-10
ACGTACGA	TCGTACGT	4.02978e-14	5.63375e-12	<1E-10
ATAAAAAG	CTTTTTAT	4.04172e-14	5.63375e-12	<1E-10
GACAAAAA	TTTTTGTC	4.3293e-14	6.00915e-12	<1E-10
ACGACTAC	GTAGTCGT	4.36594e-14	6.03453e-12	<1E-10
ATATTAAT	ATTAATAT	5.01724e-14	6.90574e-12	<1E-10
AATAAATG	CATTTATT	5.76794e-14	7.90593e-12	<1E-10
ATTAATAC	GTATTAAT	5.83821e-14	7.96903e-12	<1E-10
ATCAAATA	TATTTGAT	6.09738e-14	8.28841e-12	<1E-10
TACGCGTA	TACGCGTA	6.33149e-14	8.57122e-12	<1E-10
GGAAATAA	TTATTTCC	6.53664e-14	8.81267e-12	<1E-10
AACAAATA	TATTTGTT	7.73141e-14	1.03809e-11	<1E-10
ACGCGTTG	CAACGCGT	7.83027e-14	1.04709e-11	<1E-10
TTGACCAA	TTGGTCAA	7.93835e-14	1.05725e-11	<1E-10
AAAAAACT	AGTTTTTT	8.23106e-14	1.09181e-11	<1E-10
CTAAATAA	TTATTTAG	8.3827e-14	1.10746e-11	<1E-10
TAAAACTA	TAGTTTTA	8.75378e-14	1.15186e-11	<1E-10
AAAATAGT	ACTATTTT	9.81463e-14	1.2863e-11	<1E-10
ACTATAGT	ACTATAGT	9.98844e-14	1.30389e-11	<1E-10
AACACGTG	CACGTGTT	1.19982e-13	1.56006e-11	<1E-10
AATTATTA	TAATAATT	1.22878e-13	1.59141e-11	<1E-10
CTAAAATA	TATTTTAG	1.2593e-13	1.62455e-11	<1E-10
ATTTAATG	CATTAAAT	1.52753e-13	1.96288e-11	<1E-10
GGTCCCAC	GTGGGACC	1.54372e-13	1.96844e-11	<1E-10
AATCATAT	ATATGATT	1.54383e-13	1.96844e-11	<1E-10
AATACTAA	TTAGTATT	1.66963e-13	2.12063e-11	<1E-10
AGAATATA	TATATTCT	1.7544e-13	2.21972e-11	<1E-10
GGGTCCAC	GTGGACCC	1.86478e-13	2.35034e-11	<1E-10
TACTACTA	TAGTAGTA	2.17431e-13	2.73e-11	<1E-10
ATTAATTG	CAATTAAT	2.19916e-13	2.7507e-11	<1E-10
ACGCGTGA	TCACGCGT	2.30819e-13	2.87615e-11	<1E-10
AATAAAGA	TCTTTATT	2.57369e-13	3.19487e-11	<1E-10
GTCGGTCA	TGACCGAC	2.71548e-13	3.35822e-11	<1E-10
AACTAATT	AATTAGTT	2.79672e-13	3.44573e-11	<1E-10
AATTTTTA	TAAAAATT	2.97355e-13	3.64992e-11	<1E-10
TGTTATAA	TTATAACA	3.99053e-13	4.88001e-11	<1E-10
ATATGTAA	TTACATAT	4.02776e-13	4.90731e-11	<1E-10
GAAAAATA	TATTTTTC	4.40303e-13	5.34473e-11	<1E-10
AATATATG	CATATATT	4.56786e-13	5.52442e-11	<1E-10
CAATTATA	TATAATTG	4.61737e-13	5.56385e-11	<1E-10
ATAAAAGA	TCTTTTAT	4.66678e-13	5.60286e-11	<1E-10
AAATACTA	TAGTATTT	4.79312e-13	5.73362e-11	<1E-10
AAAATACA	TGTATTTT	4.9133e-13	5.85609e-11	<1E-10
AATATAGA	TCTATATT	5.35914e-13	6.36441e-11	<1E-10
ATACTAAT	ATTAGTAT	5.54695e-13	6.56375e-11	<1E-10
AATTATGT	ACATAATT	6.08329e-13	7.17262e-11	<1E-10
AATAAAAG	CTTTTATT	6.25939e-13	7.35389e-11	<1E-10
CGACCGAC	GTCGGTCG	6.73261e-13	7.88171e-11	<1E-10
AAATTAGT	ACTAATTT	6.91392e-13	8.06527e-11	<1E-10
CTATAATA	TATTATAG	8.18757e-13	9.51726e-11	<1E-10
CAAATATA	TATATTTG	8.60809e-13	9.94315e-11	<1E-10
TACTTTAA	TTAAAGTA	8.61441e-13	9.94315e-11	<1E-10
$down

## Sheet: hexamers_FC1.5
$up
k-mer	k-mer (reverse)	MetaPvalue	PBH	Pbonferroni
ACGCGT	ACGCGT	3.64917e-85	7.59028e-82	7.59028e-82
ACGTGG	CCACGT	9.0393e-63	9.40087e-60	1.88017e-59
ACACGT	ACGTGT	1.32423e-60	9.18131e-58	2.75439e-57
ATTAAT	ATTAAT	1.69356e-58	8.80653e-56	3.52261e-55
CACGTG	CACGTG	1.22744e-57	5.10613e-55	2.55307e-54
TAATTA	TAATTA	1.75858e-55	6.0964e-53	3.65784e-52
TATTAA	TTAATA	8.11188e-49	2.41039e-46	1.68727e-45
TAAATA	TATTTA	1.26818e-47	3.29727e-45	2.63781e-44
ATTATA	TATAAT	2.23762e-47	5.17139e-45	4.65425e-44
ATATAT	ATATAT	7.17051e-47	1.49147e-44	1.49147e-43
TATATA	TATATA	8.27302e-46	1.56435e-43	1.72079e-42
ACGTAT	ATACGT	1.78855e-45	3.10015e-43	3.72019e-42
AATTAT	ATAATT	1.99139e-45	3.18623e-43	4.14209e-42
TAATAA	TTATTA	3.3159e-44	4.92648e-42	6.89707e-41
ATATTA	TAATAT	2.20798e-43	3.06174e-41	4.59261e-40
CACGTA	TACGTG	2.68286e-41	3.48772e-39	5.58035e-38
GTATTA	TAATAC	7.80563e-41	9.55041e-39	1.62357e-37
ATAAAT	ATTTAT	7.1687e-40	8.28383e-38	1.49109e-36
AACGCG	CGCGTT	3.0602e-39	3.35011e-37	6.36521e-36
AATAAT	ATTATT	5.45296e-39	5.67108e-37	1.13422e-35
TTATAA	TTATAA	1.35112e-38	1.33825e-36	2.81032e-35
ATAATA	TATTAT	1.52923e-38	1.44581e-36	3.18079e-35
AATATA	TATATT	5.22136e-37	4.72192e-35	1.08604e-33
TAGATA	TATCTA	7.76174e-37	6.72684e-35	1.61444e-33
ATTAAA	TTTAAT	2.02211e-36	1.68239e-34	4.20598e-33
AAATAA	TTATTT	5.45282e-36	4.36225e-34	1.13419e-32
AATTAA	TTAATT	4.68396e-35	3.60838e-33	9.74263e-32
ATTTTA	TAAAAT	5.97294e-35	4.43704e-33	1.24237e-31
ATATAA	TTATAT	6.64933e-35	4.76917e-33	1.38306e-31
AATATT	AATATT	1.95909e-34	1.3583e-32	4.0749e-31
ATTTAA	TTAAAT	2.42845e-33	1.62941e-31	5.05118e-30
AAATTA	TAATTT	4.92693e-33	3.2025e-31	1.0248e-29
CAATTA	TAATTG	6.41326e-33	4.04229e-31	1.33396e-29
AAAATA	TATTTT	3.4361e-32	2.10209e-30	7.1471e-29
CGTGTC	GACACG	6.00785e-32	3.57038e-30	1.24963e-28
ACTATA	TATAGT	8.37177e-31	4.83702e-29	1.74133e-27
ACGTAA	TTACGT	3.28455e-30	1.84645e-28	6.83186e-27
AATATC	GATATT	1.34344e-28	7.35359e-27	2.79436e-25
TTTAAA	TTTAAA	4.04627e-27	2.15801e-25	8.41623e-24
AATTAG	CTAATT	5.12871e-27	2.65041e-25	1.06677e-23
TTAAAA	TTTTAA	5.22436e-27	2.65041e-25	1.08667e-23
ATTACG	CGTAAT	5.4984e-27	2.72302e-25	1.14367e-23
AAATTT	AAATTT	1.07496e-26	5.19978e-25	2.23591e-23
AATTTA	TAAATT	1.19336e-26	5.64135e-25	2.48219e-23
ATACTA	TAGTAT	4.11908e-26	1.90393e-24	8.56769e-23
CACACG	CGTGTG	4.31596e-26	1.95156e-24	8.9772e-23
AGTATA	TATACT	1.4723e-25	6.5157e-24	3.06238e-22
CGTATA	TATACG	1.53285e-25	6.64234e-24	3.18832e-22
AATAAA	TTTATT	2.2706e-25	9.63846e-24	4.72285e-22
ACTAAT	ATTAGT	2.68912e-25	1.11867e-23	5.59336e-22
CGTGGC	GCCACG	5.71988e-25	2.33281e-23	1.18974e-21
AATATG	CATATT	2.28559e-23	9.14234e-22	4.75402e-20
AATAGT	ACTATT	3.93101e-23	1.54274e-21	8.17651e-20
AAATAT	ATATTT	4.16177e-23	1.60305e-21	8.65648e-20
CTAATA	TATTAG	5.778e-23	2.18513e-21	1.20182e-19
GTTATA	TATAAC	6.99576e-23	2.59842e-21	1.45512e-19
CGCGTA	TACGCG	1.98398e-22	7.23979e-21	4.12668e-19
ATATTC	GAATAT	3.49363e-22	1.25289e-20	7.26674e-19
ATAGTA	TACTAT	4.61145e-22	1.62573e-20	9.59182e-19
TACGTA	TACGTA	5.2238e-22	1.81092e-20	1.08655e-18
GAATAA	TTATTC	4.19525e-21	1.43051e-19	8.72612e-18
AATACT	AGTATT	4.80205e-21	1.61101e-19	9.98826e-18
TACATA	TATGTA	4.92774e-21	1.62694e-19	1.02497e-17
GATATA	TATATC	5.47528e-21	1.77947e-19	1.13886e-17
CATTAA	TTAATG	5.7297e-21	1.8335e-19	1.19178e-17
CACGCG	CGCGTG	6.07854e-21	1.91566e-19	1.26434e-17
ACCGAC	GTCGGT	9.56199e-21	2.9685e-19	1.98889e-17
ACGCGG	CCGCGT	9.95869e-21	3.04619e-19	2.07141e-17
AATTGT	ACAATT	1.50726e-20	4.54363e-19	3.13511e-17
ACGCGC	GCGCGT	5.98449e-20	1.77825e-18	1.24477e-16
TATTCA	TGAATA	1.61472e-19	4.73044e-18	3.35861e-16
AAAATT	AATTTT	2.52682e-19	7.2997e-18	5.25579e-16
ATAATC	GATTAT	2.68253e-19	7.64337e-18	5.57966e-16
GTACTA	TAGTAC	4.06541e-19	1.14271e-17	8.45606e-16
ACAAAT	ATTTGT	4.70276e-19	1.30423e-17	9.78174e-16
TATAAA	TTTATA	5.53464e-19	1.51474e-17	1.1512e-15
CAAATA	TATTTG	8.81361e-19	2.38082e-17	1.83323e-15
CCGACA	TGTCGG	2.05005e-18	5.4668e-17	4.2641e-15
CATAAA	TTTATG	2.43193e-18	6.40304e-17	5.05841e-15
AAATAC	GTATTT	2.94085e-18	7.64622e-17	6.11698e-15
ACGTTA	TAACGT	4.25628e-18	1.09297e-16	8.85306e-15
ATATAC	GTATAT	7.24377e-18	1.83745e-16	1.50671e-14
AAAAAA	TTTTTT	8.81546e-18	2.20918e-16	1.83361e-14
AATTTG	CAAATT	1.14558e-17	2.83668e-16	2.38281e-14
CATTTA	TAAATG	1.49487e-17	3.65804e-16	3.10933e-14
TAAAAA	TTTTTA	6.26112e-17	1.51432e-15	1.30231e-13
ACATAT	ATATGT	6.62838e-17	1.58471e-15	1.3787e-13
CATATA	TATATG	1.07282e-16	2.53575e-15	2.23146e-13
ATAATG	CATTAT	2.25774e-16	5.27652e-15	4.6961e-13
AGATAT	ATATCT	3.8543e-16	8.90772e-15	8.01695e-13
ACTTAA	TTAAGT	1.02898e-15	2.35195e-14	2.14028e-12
AATACG	CGTATT	3.04176e-15	6.87701e-14	6.32685e-12
ATTTTG	CAAAAT	6.12395e-15	1.36966e-13	1.27378e-11
ATTATG	CATAAT	6.84721e-15	1.51513e-13	1.42422e-11
CGCGTC	GACGCG	8.28172e-15	1.81326e-13	1.7226e-11
AAAAAT	ATTTTT	1.11809e-14	2.42253e-13	2.32563e-11
ATAACA	TGTTAT	1.15382e-14	2.47417e-13	2.39994e-11
GCCGAC	GTCGGC	1.20729e-14	2.5624e-13	2.51115e-11
CAACTA	TAGTTG	1.36358e-14	2.8649e-13	2.83625e-11
CCCCAC	GTGGGG	1.62872e-14	3.38773e-13	3.38773e-11
GGACCC	GGGTCC	1.71941e-14	3.54096e-13	3.57637e-11
ACATTA	TAATGT	2.02967e-14	4.13893e-13	4.22171e-11
CTATAG	CTATAG	2.41373e-14	4.87434e-13	5.02057e-11
CGTACG	CGTACG	2.82195e-14	5.64391e-13	5.86966e-11
ACACAT	ATGTGT	3.17249e-14	6.28455e-13	6.59878e-11
ACTAAA	TTTAGT	3.26185e-14	6.40062e-13	6.78466e-11
AAAAGT	ACTTTT	3.31995e-14	6.45373e-13	6.90549e-11
TATCCA	TGGATA	3.35589e-14	6.4632e-13	6.98026e-11
GTCCAC	GTGGAC	3.57104e-14	6.81445e-13	7.42775e-11
GTCAAC	GTTGAC	3.81899e-14	7.18469e-13	7.94349e-11
AATTAC	GTAATT	3.83414e-14	7.18469e-13	7.97501e-11
ATATCC	GGATAT	4.4856e-14	8.33039e-13	9.33004e-11
CGTGGA	TCCACG	4.64915e-14	8.55773e-13	9.67023e-11
AATACA	TGTATT	4.79212e-14	8.74351e-13	9.9676e-11
CACGTC	GACGTG	4.92259e-14	8.90347e-13	<1E-10
TAAGTA	TACTTA	7.04247e-14	1.26279e-12	<1E-10
TATCAA	TTGATA	1.10034e-13	1.95616e-12	<1E-10
GAAATA	TATTTC	1.3269e-13	2.33895e-12	<1E-10
TATAGA	TCTATA	3.10819e-13	5.4328e-12	<1E-10
ATAAAA	TTTTAT	3.66076e-13	6.34533e-12	<1E-10
ACTTAT	ATAAGT	5.32396e-13	9.09096e-12	<1E-10
AAATTG	CAATTT	5.3322e-13	9.09096e-12	<1E-10
ATAGTG	CACTAT	5.79526e-13	9.80012e-12	<1E-10
TAGACA	TGTCTA	9.36036e-13	1.57012e-11	<1E-10
GACAAA	TTTGTC	1.30928e-12	2.17865e-11	<1E-10
GAAAAA	TTTTTC	1.31998e-12	2.17901e-11	<1E-10
AAAGTA	TACTTT	1.44427e-12	2.36541e-11	<1E-10
GGATAA	TTATCC	2.46702e-12	4.0089e-11	<1E-10
CTACTA	TAGTAG	3.19882e-12	5.1578e-11	<1E-10
AAAACG	CGTTTT	3.35146e-12	5.36234e-11	<1E-10
AAACGT	ACGTTT	3.52991e-12	5.60474e-11	<1E-10
ATGTTA	TAACAT	3.84386e-12	6.05699e-11	<1E-10
ATCATA	TATGAT	4.94026e-12	7.72612e-11	<1E-10
TAGTCA	TGACTA	5.52761e-12	8.58017e-11	<1E-10
$down

## Sheet: septamers_FC1.5
$up
k-mer	k-mer (reverse)	MetaPvalue	PBH	Pbonferroni
AAATATC	GATATTT	9.96705e-77	7.67771e-73	8.16501e-73
AACGCGT	ACGCGTT	1.87444e-76	7.67771e-73	1.53554e-72
AAAATAA	TTATTTT	8.09156e-75	2.20954e-71	6.62861e-71
AATTAAT	ATTAATT	1.35368e-65	2.77233e-62	1.10893e-61
TAATTAA	TTAATTA	5.53548e-64	8.79331e-61	4.53466e-60
ATAATAT	ATATTAT	6.44041e-64	8.79331e-61	5.27598e-60
TAAAATA	TATTTTA	7.60658e-64	8.90188e-61	6.23131e-60
AATTAAA	TTTAATT	9.33067e-64	9.5546e-61	7.64368e-60
AAATAAA	TTTATTT	3.6575e-63	3.31712e-60	2.99623e-59
ATAAAAT	ATTTTAT	4.04922e-63	3.31712e-60	3.31712e-59
TAATAAA	TTTATTA	2.50223e-61	1.86348e-58	2.04983e-57
AATAATA	TATTATT	1.59191e-60	1.08674e-57	1.30409e-56
TATAATA	TATTATA	3.49718e-58	2.20376e-55	2.86489e-54
AAATAAT	ATTATTT	2.64771e-57	1.54929e-54	2.169e-53
ATTAAAT	ATTTAAT	4.52053e-56	2.46881e-53	3.70322e-52
TATTTAA	TTAAATA	1.13494e-55	5.81089e-53	9.29742e-52
AAATTAA	TTAATTT	1.28283e-55	6.18171e-53	1.05089e-51
TATTAAA	TTTAATA	2.93192e-55	1.33435e-52	2.40183e-51
AAAAATA	TATTTTT	1.04516e-54	4.50629e-52	8.56195e-51
TAAATAA	TTATTTA	6.96338e-54	2.8522e-51	5.7044e-50
TTAATAA	TTATTAA	1.25809e-53	4.90776e-51	1.03063e-49
AATAAAT	ATTTATT	1.99819e-53	7.44053e-51	1.63692e-49
AATTTAA	TTAAATT	2.18459e-53	7.78092e-51	1.78961e-49
AATAAAA	TTTTATT	7.34698e-52	2.50777e-49	6.01864e-48
ATTAAAA	TTTTAAT	1.05967e-51	3.47234e-49	8.68084e-48
AATAATT	AATTATT	5.68644e-51	1.79167e-48	4.65833e-47
ATAAAAA	TTTTTAT	7.84334e-51	2.37973e-48	6.42527e-47
ACGTGGC	GCCACGT	1.01411e-50	2.967e-48	8.3076e-47
AATATTA	TAATATT	1.36431e-50	3.85395e-48	1.11765e-46
ACACGTG	CACGTGT	1.53411e-50	4.14988e-48	1.25674e-46
TAAAAAA	TTTTTTA	1.57039e-50	4.14988e-48	1.28646e-46
TATATAA	TTATATA	2.72751e-50	6.98242e-48	2.23438e-46
ATAAATA	TATTTAT	4.15771e-49	1.03212e-46	3.40599e-45
ATAATAA	TTATTAT	6.39273e-47	1.54027e-44	5.23693e-43
TTAAAAA	TTTTTAA	8.61951e-47	2.01746e-44	7.0611e-43
ATTATTA	TAATAAT	2.53188e-46	5.76143e-44	2.07412e-42
ATTTTTA	TAAAAAT	2.77895e-46	6.15275e-44	2.27652e-42
AATATAT	ATATATT	1.4498e-45	3.12547e-43	1.18768e-41
ATATATA	TATATAT	3.89016e-45	8.17133e-43	3.18682e-41
CACGTGG	CCACGTG	7.07293e-45	1.44854e-42	5.79414e-41
ATATAAT	ATTATAT	2.59952e-44	5.19397e-42	2.12953e-40
TATAAAA	TTTTATA	6.02434e-44	1.17503e-41	4.93514e-40
ATATTTA	TAAATAT	7.27809e-44	1.38656e-41	5.96221e-40
AAAATTA	TAATTTT	2.41993e-43	4.50548e-41	1.98241e-39
ACGTGTC	GACACGT	3.11443e-43	5.66964e-41	2.55134e-39
AATTATA	TATAATT	1.17821e-42	2.09823e-40	9.65186e-39
AAAATAT	ATATTTT	1.88939e-42	3.29316e-40	1.54779e-38
AATTTTA	TAAAATT	3.21508e-42	5.48707e-40	2.63379e-38
ATAATTA	TAATTAT	4.09259e-42	6.84214e-40	3.35265e-38
AATTAGT	ACTAATT	5.19873e-42	8.5176e-40	4.2588e-38
AAATATA	TATATTT	5.63444e-42	9.05045e-40	4.61573e-38
ATTTTAA	TTAAAAT	7.04827e-42	1.11037e-39	5.77394e-38
TAATATA	TATATTA	2.45385e-41	3.79282e-39	2.01019e-37
ATTAATA	TATTAAT	3.00982e-41	4.56601e-39	2.46564e-37
AATATCT	AGATATT	5.56013e-41	8.28157e-39	4.55486e-37
ATTATAA	TTATAAT	6.50326e-41	9.51335e-39	5.32747e-37
AAATATT	AATATTT	1.54908e-40	2.22632e-38	1.269e-36
AAAAAAA	TTTTTTT	6.41943e-40	9.06688e-38	5.25879e-36
TAAATTA	TAATTTA	7.31709e-40	1.01596e-37	5.99416e-36
AATTTAT	ATAAATT	4.33639e-39	5.92061e-37	3.55237e-35
ATTTAAA	TTTAAAT	3.45126e-38	4.63487e-36	2.82727e-34
TTTAAAA	TTTTAAA	3.48501e-37	4.60472e-35	2.85492e-33
AAATTTA	TAAATTT	6.19952e-37	8.06134e-35	5.07865e-33
TTATAAA	TTTATAA	7.84772e-36	1.00451e-33	6.42885e-32
ACGCGTA	TACGCGT	1.17984e-35	1.48696e-33	9.66522e-32
ATATTAA	TTAATAT	1.33362e-35	1.6553e-33	1.0925e-31
AAAAAAT	ATTTTTT	2.92714e-35	3.57897e-33	2.39791e-31
CAAAATA	TATTTTG	5.02999e-34	6.05966e-32	4.12057e-30
AAAAAAG	CTTTTTT	5.60803e-34	6.65811e-32	4.5941e-30
AATACTA	TAGTATT	8.0789e-34	9.45462e-32	6.61823e-30
CGCGTTA	TAACGCG	9.06733e-34	1.04619e-31	7.42795e-30
AAAATTT	AAATTTT	7.95114e-33	9.04663e-31	6.51357e-29
ACAAAAA	TTTTTGT	1.60078e-32	1.79638e-30	1.31135e-28
ATATTTG	CAAATAT	3.76943e-32	4.17286e-30	3.08792e-28
ATATCTA	TAGATAT	1.08528e-31	1.18542e-29	8.89062e-28
TAGAAAA	TTTTCTA	1.27263e-31	1.37176e-29	1.04254e-27
CAAATTA	TAATTTG	1.92002e-31	2.04271e-29	1.57288e-27
ACGTGTG	CACACGT	8.04264e-31	8.44683e-29	6.58853e-27
ATTATTG	CAATAAT	1.65798e-30	1.71926e-28	1.35821e-26
ACAAATA	TATTTGT	3.47925e-30	3.56275e-28	2.8502e-26
AAATTAT	ATAATTT	3.92092e-30	3.96545e-28	3.21201e-26
TATCTAA	TTAGATA	1.40351e-29	1.40214e-27	1.14975e-25
ACACGTA	TACGTGT	2.08519e-29	2.05806e-27	1.70819e-25
CAAAAAA	TTTTTTG	3.51558e-28	3.42852e-26	2.87996e-24
CAAATAA	TTATTTG	1.22482e-27	1.18044e-25	1.00337e-23
GTATTAA	TTAATAC	1.5829e-27	1.5078e-25	1.29671e-23
GAAAATA	TATTTTC	2.43484e-27	2.29267e-25	1.99462e-23
ATATAAA	TTTATAT	3.49919e-27	3.25742e-25	2.86653e-23
TATAACA	TGTTATA	3.77931e-27	3.47866e-25	3.09601e-23
ATACTAT	ATAGTAT	7.49165e-26	6.81907e-24	6.13716e-22
AAACGCG	CGCGTTT	9.8154e-26	8.83602e-24	8.04078e-22
AAATAGT	ACTATTT	2.10271e-25	1.87232e-23	1.72254e-21
AAAAAGT	ACTTTTT	5.14923e-25	4.53575e-23	4.21825e-21
AAAAATT	AATTTTT	7.67357e-25	6.68744e-23	6.28619e-21
ATTTATG	CATAAAT	8.60359e-25	7.41901e-23	7.04806e-21
AATTTTG	CAAAATT	8.83704e-25	7.54094e-23	7.2393e-21
ACTAATA	TATTAGT	1.20622e-24	1.01869e-22	9.88133e-21
GAAATAA	TTATTTC	1.49233e-24	1.24747e-22	1.22252e-20
TAATTGA	TCAATTA	1.95642e-24	1.61889e-22	1.6027e-20
AAGAAAA	TTTTCTT	2.40054e-24	1.96652e-22	1.96652e-20
AGAAAAA	TTTTTCT	5.64179e-24	4.55333e-22	4.62175e-20
AATATTC	GAATATT	5.66943e-24	4.55333e-22	4.6444e-20
AATAATG	CATTATT	5.94013e-24	4.72443e-22	4.86616e-20
ATAATTG	CAATTAT	6.54618e-24	5.15637e-22	5.36263e-20
ACAATTA	TAATTGT	8.02388e-24	6.26016e-22	6.57316e-20
CTATTTA	TAAATAG	1.52092e-23	1.17542e-21	1.24594e-19
CTAATTA	TAATTAG	1.74977e-23	1.33964e-21	1.43342e-19
ATAATAC	GTATTAT	1.91909e-23	1.45567e-21	1.57212e-19
AAAAAAC	GTTTTTT	2.66844e-23	2.00549e-21	2.18598e-19
CGTGGCA	TGCCACG	3.7955e-23	2.82661e-21	3.10927e-19
ACGTATA	TATACGT	6.52745e-23	4.81738e-21	5.34729e-19
AATATAC	GTATATT	1.07904e-22	7.89244e-21	8.83953e-19
ATACGTG	CACGTAT	1.15629e-22	8.38261e-21	9.47235e-19
ATATGTA	TACATAT	2.11719e-22	1.52141e-20	1.73441e-18
AGAAAAT	ATTTTCT	2.23673e-22	1.59333e-20	1.83233e-18
AACACGT	ACGTGTT	2.59171e-22	1.83029e-20	2.12313e-18
AAAATAC	GTATTTT	4.27116e-22	2.99054e-20	3.49893e-18
GACCGAC	GTCGGTC	5.48759e-22	3.80969e-20	4.49543e-18
AATATAA	TTATATT	5.97268e-22	4.11161e-20	4.89282e-18
ACGTGGA	TCCACGT	6.79591e-22	4.63934e-20	5.56721e-18
AAAAGTC	GACTTTT	7.32771e-22	4.96104e-20	6.00286e-18
ACATAAA	TTTATGT	8.04217e-22	5.40012e-20	6.58814e-18
ACGTATG	CATACGT	8.46084e-22	5.63505e-20	6.93112e-18
ACTACTA	TAGTAGT	1.24613e-21	8.23252e-20	1.02083e-17
AAAGAAA	TTTCTTT	1.39889e-21	9.16778e-20	1.14597e-17
ACGCGCT	AGCGCGT	1.59387e-21	1.03627e-19	1.3057e-17
AAATATG	CATATTT	1.8549e-21	1.19649e-19	1.51954e-17
CCACGTA	TACGTGG	2.29957e-21	1.47173e-19	1.88381e-17
CACGTAA	TTACGTG	2.48424e-21	1.57759e-19	2.03509e-17
CCACGCG	CGCGTGG	4.16801e-21	2.62649e-19	3.41443e-17
ATATTCA	TGAATAT	5.21526e-21	3.26133e-19	4.27234e-17
CGCGTAA	TTACGCG	6.87596e-21	4.26726e-19	5.63279e-17
ACATTAA	TTAATGT	7.39799e-21	4.55672e-19	6.06044e-17
ACCACGT	ACGTGGT	2.31329e-20	1.41421e-18	1.89504e-16
GATATTA	TAATATC	2.44905e-20	1.48612e-18	2.00626e-16
AAAAGAA	TTCTTTT	2.58007e-20	1.55411e-18	2.11359e-16
ATTATTC	GAATAAT	2.60792e-20	1.55942e-18	2.13641e-16
CGTGTCA	TGACACG	2.86246e-20	1.69922e-18	2.34493e-16
CCACGTC	GACGTGG	3.54498e-20	2.08924e-18	2.90405e-16
ATATATG	CATATAT	3.88312e-20	2.27218e-18	3.18105e-16
AACATAT	ATATGTT	4.6949e-20	2.7277e-18	3.84606e-16
AAATGAA	TTCATTT	7.1437e-20	4.12121e-18	5.85212e-16
GACAAAA	TTTTGTC	9.28259e-20	5.31769e-18	7.6043e-16
GAAAAAA	TTTTTTC	1.02062e-19	5.8062e-18	8.36092e-16
ACGTGTA	TACACGT	1.23959e-19	7.00325e-18	1.01547e-15
GGGACCC	GGGTCCC	1.55096e-19	8.70235e-18	1.27054e-15
ACGCGTC	GACGCGT	1.8995e-19	1.05855e-17	1.55607e-15
AAAAAGA	TCTTTTT	2.07916e-19	1.15084e-17	1.70325e-15
CAATTTA	TAAATTG	2.48089e-19	1.36399e-17	2.03234e-15
ACTATAG	CTATAGT	3.64841e-19	1.99252e-17	2.98878e-15
GTACTAA	TTAGTAC	5.6476e-19	3.06391e-17	4.62651e-15
ATTAATG	CATTAAT	5.93133e-19	3.19667e-17	4.85894e-15
AAAACTA	TAGTTTT	7.13446e-19	3.81997e-17	5.84455e-15
TAATACA	TGTATTA	1.19695e-18	6.36715e-17	9.8054e-15
AATTACG	CGTAATT	1.56081e-18	8.24914e-17	1.27862e-14
AAATTAC	GTAATTT	2.11778e-18	1.1121e-16	1.73488e-14
ATATATC	GATATAT	2.55107e-18	1.33111e-16	2.08984e-14
AACTATA	TATAGTT	3.31924e-18	1.72096e-16	2.71912e-14
TATTTGA	TCAAATA	3.38133e-18	1.73161e-16	2.76998e-14
AGTATTA	TAATACT	3.38204e-18	1.73161e-16	2.77057e-14
ACCGCGT	ACGCGGT	4.30589e-18	2.19092e-16	3.52738e-14
AACAAAT	ATTTGTT	6.65616e-18	3.36588e-16	5.45272e-14
ACAAAAT	ATTTTGT	7.3412e-18	3.68951e-16	6.01391e-14
AAAAATG	CATTTTT	7.50449e-18	3.74859e-16	6.14768e-14
AAATTGT	ACAATTT	7.83841e-18	3.89165e-16	6.42123e-14
GTGGATA	TATCCAC	9.28901e-18	4.58407e-16	7.60956e-14
ACGCGTG	CACGCGT	1.10817e-17	5.43599e-16	9.07811e-14
ATAAAGA	TCTTTAT	1.20678e-17	5.88447e-16	9.88591e-14
ACTATTA	TAATAGT	1.44998e-17	7.02853e-16	1.18782e-13
AAATTAG	CTAATTT	1.56761e-17	7.51954e-16	1.28419e-13
CTAAATA	TATTTAG	1.56963e-17	7.51954e-16	1.28584e-13
AATTAAC	GTTAATT	1.92106e-17	9.14962e-16	1.57373e-13
GTTATAA	TTATAAC	1.995e-17	9.44682e-16	1.6343e-13
ATATTAC	GTAATAT	2.03443e-17	9.57818e-16	1.6666e-13
TAGTATA	TATACTA	2.14832e-17	1.00566e-15	1.7599e-13
ATTAGTA	TACTAAT	3.04723e-17	1.41835e-15	2.49629e-13
CTAATAA	TTATTAG	4.44928e-17	2.05924e-15	3.64485e-13
GTAAATA	TATTTAC	5.81763e-17	2.67742e-15	4.7658e-13
AATTTGT	ACAAATT	6.76228e-17	3.09478e-15	5.53966e-13
ATACGTA	TACGTAT	7.52155e-17	3.42314e-15	6.16166e-13
AAAAACA	TGTTTTT	9.56834e-17	4.3306e-15	7.83838e-13
TATTAGA	TCTAATA	1.00092e-16	4.50523e-15	8.19951e-13
AATTATG	CATAATT	1.10396e-16	4.94187e-15	9.04362e-13
ACTATAA	TTATAGT	1.24415e-16	5.53918e-15	1.01921e-12
AAAACAT	ATGTTTT	1.28948e-16	5.70994e-15	1.05634e-12
TGATTAA	TTAATCA	1.54182e-16	6.79066e-15	1.26306e-12
TACTATA	TATAGTA	2.37153e-16	1.03891e-14	1.94276e-12
ATTTTTG	CAAAAAT	2.44164e-16	1.06393e-14	2.00019e-12
ACTAAAA	TTTTAGT	2.72683e-16	1.18192e-14	2.23382e-12
GTCGACA	TGTCGAC	3.63513e-16	1.56686e-14	2.9779e-12
AATATCC	GGATATT	3.6532e-16	1.56686e-14	2.9927e-12
CTTTTTA	TAAAAAG	4.32234e-16	1.8442e-14	3.54086e-12
AATACGT	ACGTATT	4.80333e-16	2.0388e-14	3.93489e-12
CAATAAA	TTTATTG	5.60784e-16	2.36801e-14	4.59394e-12
AACTAAT	ATTAGTT	5.94351e-16	2.49688e-14	4.86892e-12
CAATTAA	TTAATTG	6.07482e-16	2.53903e-14	4.97649e-12
AATAAAG	CTTTATT	7.29366e-16	3.03298e-14	5.97497e-12
GGACCCA	TGGGTCC	7.71718e-16	3.19289e-14	6.32191e-12
AGAAATA	TATTTCT	8.00824e-16	3.29666e-14	6.56035e-12
ACTTTTA	TAAAAGT	9.21177e-16	3.77314e-14	7.54628e-12
ACGTAAA	TTTACGT	9.2719e-16	3.77888e-14	7.59554e-12
TATGTAA	TTACATA	1.13035e-15	4.58406e-14	9.2598e-12
ATACATA	TATGTAT	1.24893e-15	5.04001e-14	1.02312e-11
ACTAAAT	ATTTAGT	1.57148e-15	6.31057e-14	1.28736e-11
TGGTCAA	TTGACCA	1.69327e-15	6.76648e-14	1.38713e-11
AACTATT	AATAGTT	1.80914e-15	7.19439e-14	1.48204e-11
ATAATGA	TCATTAT	2.02965e-15	8.0323e-14	1.66269e-11
ATATACG	CGTATAT	2.15346e-15	8.48133e-14	1.76412e-11
ACTTAAT	ATTAAGT	2.52983e-15	9.91598e-14	2.07244e-11
AAGTATA	TATACTT	3.37057e-15	1.31484e-13	2.76117e-11
ACCGACA	TGTCGGT	3.45803e-15	1.34257e-13	2.83282e-11
GTTTTTA	TAAAAAC	3.49823e-15	1.35177e-13	2.86575e-11
ATCTTAA	TTAAGAT	3.81784e-15	1.46834e-13	3.12758e-11
ACCCCAC	GTGGGGT	4.81396e-15	1.8428e-13	3.9436e-11
AAAATTG	CAATTTT	4.9879e-15	1.90051e-13	4.08609e-11
CGACACG	CGTGTCG	5.08499e-15	1.92634e-13	4.16562e-11
CGTAATA	TATTACG	5.10274e-15	1.92634e-13	4.18016e-11
AATATGT	ACATATT	7.40645e-15	2.78319e-13	6.06736e-11
ATAATAG	CTATTAT	7.62489e-15	2.85219e-13	6.24631e-11
ATACTTA	TAAGTAT	8.02026e-15	2.98645e-13	6.5702e-11
TAGACAA	TTGTCTA	8.16445e-15	3.02639e-13	6.68832e-11
ATTTTTC	GAAAAAT	9.58116e-15	3.53554e-13	7.84889e-11
GTCAAAA	TTTTGAC	9.99698e-15	3.67243e-13	8.18952e-11
AGTCAAA	TTTGACT	1.11841e-14	4.0902e-13	9.16205e-11
AAAATAG	CTATTTT	1.15113e-14	4.19114e-13	9.43007e-11
CGTGTGA	TCACACG	1.23942e-14	4.49263e-13	<1E-10
CATAATA	TATTATG	1.27287e-14	4.59356e-13	<1E-10
AATGAAT	ATTCATT	1.47308e-14	5.29275e-13	<1E-10
CACGCGC	GCGCGTG	1.49979e-14	5.36517e-13	<1E-10
AATACAT	ATGTATT	1.60281e-14	5.7088e-13	<1E-10
CATAAAA	TTTTATG	1.64e-14	5.81597e-13	<1E-10
TAAACTA	TAGTTTA	1.6504e-14	5.82762e-13	<1E-10
CTAAAAA	TTTTTAG	1.77532e-14	6.24179e-13	<1E-10
AATTTTC	GAAAATT	1.85107e-14	6.48033e-13	<1E-10
AAAAACT	AGTTTTT	1.96947e-14	6.86549e-13	<1E-10
AAACATT	AATGTTT	2.01953e-14	7.01018e-13	<1E-10
GATTATA	TATAATC	2.13586e-14	7.38267e-13	<1E-10
AAATACA	TGTATTT	2.44168e-14	8.39848e-13	<1E-10
ATTATAC	GTATAAT	2.45024e-14	8.39848e-13	<1E-10
ATTTATA	TATAAAT	2.6959e-14	9.20201e-13	<1E-10
AAATAAC	GTTATTT	2.81978e-14	9.5849e-13	<1E-10
GATAATA	TATTATC	3.20065e-14	1.08346e-12	<1E-10
ATACAAA	TTTGTAT	3.4872e-14	1.1756e-12	<1E-10
ACGTACG	CGTACGT	4.96527e-14	1.66703e-12	<1E-10
AAAAACG	CGTTTTT	5.57995e-14	1.86575e-12	<1E-10
GAATATA	TATATTC	6.19025e-14	2.0614e-12	<1E-10
CATATTA	TAATATG	6.91791e-14	2.29439e-12	<1E-10
ATTACGA	TCGTAAT	7.55644e-14	2.49606e-12	<1E-10
ATAAAAC	GTTTTAT	9.26706e-14	3.04882e-12	<1E-10
TATCAAA	TTTGATA	9.35997e-14	3.06707e-12	<1E-10
CGTATTA	TAATACG	9.69614e-14	3.16457e-12	<1E-10
AATAGTA	TACTATT	1.22711e-13	3.98907e-12	<1E-10
AATTAGA	TCTAATT	1.70131e-13	5.50874e-12	<1E-10
ACGTAAT	ATTACGT	1.75316e-13	5.65428e-12	<1E-10
CATTTTA	TAAAATG	1.96691e-13	6.31878e-12	<1E-10
ATAAAAG	CTTTTAT	1.98291e-13	6.34533e-12	<1E-10
TACTTAA	TTAAGTA	1.99863e-13	6.37074e-12	<1E-10
ATAGATA	TATCTAT	2.08776e-13	6.62906e-12	<1E-10
AGAATAT	ATATTCT	2.16633e-13	6.85195e-12	<1E-10
AACGTGT	ACACGTT	3.09049e-13	9.73742e-12	<1E-10
ATATTAG	CTAATAT	3.51552e-13	1.10341e-11	<1E-10
CAACTTG	CAAGTTG	3.7578e-13	1.17496e-11	<1E-10
CTACGTA	TACGTAG	3.80877e-13	1.18637e-11	<1E-10
ATATACA	TGTATAT	3.8607e-13	1.19799e-11	<1E-10
CTTTTAA	TTAAAAG	3.89385e-13	1.20371e-11	<1E-10
TAAGATA	TATCTTA	3.94869e-13	1.21608e-11	<1E-10
GTGATAA	TTATCAC	4.4914e-13	1.37804e-11	<1E-10
AAACTAT	ATAGTTT	4.57996e-13	1.39996e-11	<1E-10
ATTTTGG	CCAAAAT	4.90726e-13	1.49443e-11	<1E-10
AATATCA	TGATATT	4.95854e-13	1.50446e-11	<1E-10
AAATGAT	ATCATTT	5.03614e-13	1.52236e-11	<1E-10
AAAATGT	ACATTTT	7.06224e-13	2.12698e-11	<1E-10
AATTTGA	TCAAATT	8.05527e-13	2.41717e-11	<1E-10
AAAGTTA	TAACTTT	8.24283e-13	2.46442e-11	<1E-10
ATTAACA	TGTTAAT	8.45162e-13	2.51766e-11	<1E-10
GGTCCCA	TGGGACC	8.86797e-13	2.63212e-11	<1E-10
GTTAATA	TATTAAC	1.14439e-12	3.38441e-11	<1E-10
ATAGTTA	TAACTAT	1.16461e-12	3.43183e-11	<1E-10
CGTGGAA	TTCCACG	1.21771e-12	3.57546e-11	<1E-10
GAATAAA	TTTATTC	1.24883e-12	3.65372e-11	<1E-10
ACAATAA	TTATTGT	1.342e-12	3.91232e-11	<1E-10
GTATTTA	TAAATAC	1.36036e-12	3.9518e-11	<1E-10
GAATTAA	TTAATTC	1.51363e-12	4.38151e-11	<1E-10
TCAAAAA	TTTTTGA	1.79724e-12	5.18416e-11	<1E-10
TAACAAA	TTTGTTA	1.84304e-12	5.29761e-11	<1E-10
ACATATA	TATATGT	2.08128e-12	5.96149e-11	<1E-10
ACGTTAA	TTAACGT	2.11095e-12	6.0254e-11	<1E-10
ATTTTGA	TCAAAAT	2.27762e-12	6.47857e-11	<1E-10
AGTTGAC	GTCAACT	2.29536e-12	6.50642e-11	<1E-10
AAAAGTA	TACTTTT	2.54038e-12	7.17615e-11	<1E-10
AATTAAG	CTTAATT	3.09381e-12	8.70944e-11	<1E-10
$down

## Sheet: octamers_FC1.5
$up
k-mer	k-mer (reverse)	MetaPvalue	PBH	Pbonferroni
AAATATCT	AGATATTT	2.92739e-67	9.62993e-63	9.63e-63
AAAATATC	GATATTTT	5.77112e-66	9.49233e-62	1.9e-61
AAAATAAA	TTTATTTT	2.02173e-59	2.2169e-55	6.65e-55
ATAAAATA	TATTTTAT	4.71821e-58	3.88025e-54	1.55e-53
AAATAAAA	TTTTATTT	1.20482e-57	7.92676e-54	3.96e-53
TAATTAAA	TTTAATTA	1.097e-56	6.01449e-53	3.61e-52
TAAAATAA	TTATTTTA	1.95373e-51	9.18139e-48	6.43e-47
AAAAAAAA	TTTTTTTT	8.91954e-49	3.66771e-45	2.93e-44
AATAAAAA	TTTTTATT	4.3646e-47	1.59531e-43	1.44e-42
AAAAATAA	TTATTTTT	5.35574e-47	1.76182e-43	1.76e-42
AATAAAAT	ATTTTATT	1.57674e-46	4.71533e-43	5.19e-42
AAATAATT	AATTATTT	2.0845e-45	5.7143e-42	6.86e-41
AATTAAAA	TTTTAATT	1.29201e-43	3.16258e-40	4.25e-39
AATAATAT	ATATTATT	1.34594e-43	3.16258e-40	4.43e-39
TAAAAAAA	TTTTTTTA	2.91735e-43	6.39794e-40	9.6e-39
AAATAATA	TATTATTT	8.80516e-43	1.81034e-39	2.9e-38
AAACGCGT	ACGCGTTT	1.21176e-42	2.34483e-39	3.99e-38
ATAATATA	TATATTAT	4.54781e-42	8.31137e-39	1.5e-37
AATAAATA	TATTTATT	7.9565e-42	1.37756e-38	2.62e-37
TTAATAAA	TTTATTAA	3.76288e-41	6.18919e-38	1.24e-36
ATATATAA	TTATATAT	8.55411e-41	1.33998e-37	2.81e-36
AAAATAAT	ATTATTTT	9.0153e-41	1.34803e-37	2.97e-36
ATTAAAAA	TTTTTAAT	1.04511e-40	1.49478e-37	3.44e-36
ACACGTGG	CCACGTGT	8.43796e-40	1.15656e-36	2.78e-35
CACGTGTC	GACACGTG	5.87185e-39	7.72641e-36	1.93e-34
AAATAAAT	ATTTATTT	2.52343e-38	3.19272e-35	8.3e-34
ACGCGTTA	TAACGCGT	5.85954e-38	7.13909e-35	1.93e-33
AAAAAATA	TATTTTTT	2.00419e-37	2.35464e-34	6.59e-33
ATAATAAA	TTTATTAT	2.67244e-37	3.03147e-34	8.79e-33
ATAAAAAA	TTTTTTAT	3.13799e-37	3.44091e-34	1.03e-32
AAAAAAAT	ATTTTTTT	5.30965e-37	5.6344e-34	1.75e-32
ACAAAAAA	TTTTTTGT	8.28663e-37	8.51865e-34	2.73e-32
ATATTATA	TATAATAT	2.65297e-36	2.59558e-33	8.73e-32
AATATCTA	TAGATATT	2.68269e-36	2.59558e-33	8.82e-32
AAATATTA	TAATATTT	2.97295e-36	2.79423e-33	9.78e-32
AATATTAT	ATAATATT	3.91053e-36	3.57335e-33	1.29e-31
TAAATAAA	TTTATTTA	5.78275e-36	5.14134e-33	1.9e-31
TATAAAAA	TTTTTATA	1.01362e-35	8.77473e-33	3.33e-31
TAAAAATA	TATTTTTA	1.85241e-35	1.56248e-32	6.09e-31
TAATAAAA	TTTTATTA	3.78375e-35	3.11176e-32	1.24e-30
ACGTGGCA	TGCCACGT	7.35267e-35	5.89935e-32	2.42e-30
ATATATTA	TAATATAT	7.92332e-35	6.20585e-32	2.61e-30
TAATAATA	TATTATTA	1.16776e-34	8.93363e-32	3.84e-30
ATTTATTA	TAATAAAT	1.29378e-34	9.67278e-32	4.26e-30
AATAATTA	TAATTATT	1.96963e-34	1.43984e-31	6.48e-30
TTAATTAA	TTAATTAA	2.41092e-34	1.72413e-31	7.93e-30
TTATAAAA	TTTTATAA	2.72838e-34	1.90963e-31	8.98e-30
ATTAATTA	TAATTAAT	4.37832e-34	3.00061e-31	1.44e-29
AATATTAA	TTAATATT	4.94457e-34	3.31952e-31	1.63e-29
AAAAAAAG	CTTTTTTT	1.55218e-33	1.02121e-30	5.11e-29
AATAATAA	TTATTATT	1.86638e-33	1.20385e-30	6.14e-29
AAAATATA	TATATTTT	2.25159e-33	1.42439e-30	7.41e-29
AAAAATAT	ATATTTTT	9.78692e-33	6.07454e-30	3.22e-28
TTATTAAA	TTTAATAA	1.12813e-32	6.76906e-30	3.71e-28
ATATAATA	TATTATAT	1.13174e-32	6.76906e-30	3.72e-28
CAAAAAAA	TTTTTTTG	1.20498e-32	7.07842e-30	3.96e-28
CACGTGGC	GCCACGTG	2.25219e-32	1.29979e-29	7.41e-28
TTAAAAAA	TTTTTTAA	2.66776e-32	1.51308e-29	8.78e-28
TATTTAAA	TTTAAATA	2.91098e-32	1.62304e-29	9.58e-28
ATTTTTAA	TTAAAAAT	5.53836e-32	3.0365e-29	1.82e-27
AAATTAAT	ATTAATTT	1.12832e-31	6.08478e-29	3.71e-27
TATTAAAA	TTTTAATA	1.51929e-31	8.06108e-29	5e-27
AATTTAAA	TTTAAATT	1.92288e-31	1.00405e-28	6.33e-27
TATAATAA	TTATTATA	2.17198e-31	1.1164e-28	7.14e-27
AAATTTTA	TAAAATTT	1.29299e-30	6.54374e-28	4.25e-26
ATTATTTA	TAAATAAT	1.38215e-30	6.88895e-28	4.55e-26
AAAAAAAC	GTTTTTTT	1.6449e-30	8.07621e-28	5.41e-26
ATAATTAA	TTAATTAT	3.95179e-30	1.91174e-27	1.3e-25
AATTTAAT	ATTAAATT	4.63614e-30	2.2103e-27	1.53e-25
AATTAAAT	ATTTAATT	2.0086e-29	9.43928e-27	6.61e-25
ATTATAAA	TTTATAAT	2.07701e-29	9.62327e-27	6.83e-25
ATAAAAAT	ATTTTTAT	3.4434e-29	1.57325e-26	1.13e-24
TTTAAAAA	TTTTTAAA	4.88745e-29	2.20243e-26	1.61e-24
AAAATTAA	TTAATTTT	6.0284e-29	2.67987e-26	1.98e-24
ATATTTTA	TAAAATAT	6.50536e-29	2.85334e-26	2.14e-24
ATTTAAAA	TTTTAAAT	6.77606e-29	2.93297e-26	2.23e-24
ATAATAAT	ATTATTAT	1.05628e-28	4.51265e-26	3.47e-24
GATATTTA	TAAATATC	1.35434e-28	5.71185e-26	4.46e-24
TATTTTAA	TTAAAATA	1.62956e-28	6.78559e-26	5.36e-24
ACAAATAT	ATATTTGT	2.91319e-28	1.19791e-25	9.58e-24
AAAAAATT	AATTTTTT	5.31566e-28	2.14083e-25	1.75e-23
ATATTAAA	TTTAATAT	5.33644e-28	2.14083e-25	1.76e-23
ATTTTAAA	TTTAAAAT	6.00094e-28	2.3784e-25	1.97e-23
AAATATGT	ACATATTT	8.0162e-28	3.1393e-25	2.64e-23
ATTATATA	TATATAAT	8.97269e-28	3.47254e-25	2.95e-23
ATTAAAAT	ATTTTAAT	9.12847e-28	3.49175e-25	3e-23
AATATATA	TATATATT	1.272e-27	4.80961e-25	4.18e-23
ATTAATAA	TTATTAAT	3.01384e-27	1.12663e-24	9.91e-23
AAAAGAAA	TTTCTTTT	4.30998e-27	1.59304e-24	1.42e-22
AACGCGTA	TACGCGTT	6.58664e-27	2.40749e-24	2.17e-22
AACGCGTT	AACGCGTT	1.35575e-26	4.90095e-24	4.46e-22
ATTAAATA	TATTTAAT	2.37108e-26	8.47814e-24	7.8e-22
ATAAATAT	ATATTTAT	4.74191e-26	1.67731e-23	1.56e-21
AAATATAC	GTATATTT	9.14769e-26	3.2013e-23	3.01e-21
AATTAATA	TATTAATT	1.10488e-25	3.82593e-23	3.63e-21
AAATATCA	TGATATTT	1.26259e-25	4.32648e-23	4.15e-21
ATATTTAA	TTAAATAT	1.40327e-25	4.75898e-23	4.62e-21
ATAATTTA	TAAATTAT	1.94018e-25	6.49312e-23	6.38e-21
AAGAAAAT	ATTTTCTT	1.9541e-25	6.49312e-23	6.43e-21
ATTTAATA	TATTAAAT	2.07907e-25	6.83929e-23	6.84e-21
AAATGAAT	ATTCATTT	4.78968e-25	1.56001e-22	1.58e-20
AACCGCGT	ACGCGGTT	5.82406e-25	1.87832e-22	1.92e-20
AATTAATT	AATTAATT	7.93587e-25	2.51635e-22	2.61e-20
ACTAATTA	TAATTAGT	7.95538e-25	2.51635e-22	2.62e-20
AAATTAAA	TTTAATTT	8.84891e-25	2.77232e-22	2.91e-20
TTAAATAA	TTATTTAA	9.44871e-25	2.93231e-22	3.11e-20
CAAAATTA	TAATTTTG	2.04632e-24	6.29118e-22	6.73e-20
CAAATAAA	TTTATTTG	2.72397e-24	8.29701e-22	8.96e-20
AAATTATT	AATAATTT	2.88713e-24	8.71332e-22	9.5e-20
AAAGAAAA	TTTTCTTT	3.64118e-24	1.08891e-21	1.2e-19
AATTTTAT	ATAAAATT	7.7171e-24	2.28704e-21	2.54e-19
AAAATTAT	ATAATTTT	1.79362e-23	5.26813e-21	5.9e-19
AAAAAGAA	TTCTTTTT	1.87722e-23	5.46486e-21	6.18e-19
AAATTTAA	TTAAATTT	2.04299e-23	5.89529e-21	6.72e-19
TTAGAAAA	TTTTCTAA	2.30813e-23	6.60244e-21	7.59e-19
AAGCGCGT	ACGCGCTT	3.56483e-23	1.00748e-20	1.17e-18
AAAAAAGA	TCTTTTTT	3.58648e-23	1.00748e-20	1.18e-18
ATATTTTC	GAAAATAT	3.61389e-23	1.00748e-20	1.19e-18
ACGTGTCA	TGACACGT	4.50652e-23	1.24577e-20	1.48e-18
GGGACCCA	TGGGTCCC	9.38175e-23	2.57185e-20	3.09e-18
ACAAAATA	TATTTTGT	9.89411e-23	2.68989e-20	3.25e-18
ATTTTATA	TATAAAAT	1.92244e-22	5.18366e-20	6.32e-18
TATTATAA	TTATAATA	7.94316e-22	2.12437e-19	2.61e-17
ATAATATC	GATATTAT	3.08441e-21	8.18265e-19	1.01e-16
GAAAAAAA	TTTTTTTC	3.46433e-21	9.11702e-19	1.14e-16
AAACAAAT	ATTTGTTT	5.4548e-21	1.42414e-18	1.79e-16
TAATTTAA	TTAAATTA	6.09762e-21	1.57943e-18	2.01e-16
AATTATAA	TTATAATT	9.23452e-21	2.37327e-18	3.04e-16
TAGAAAAA	TTTTTCTA	1.00099e-20	2.5526e-18	3.29e-16
ATAAATAA	TTATTTAT	1.26301e-20	3.196e-18	4.15e-16
ATTTTTTA	TAAAAAAT	1.3053e-20	3.27779e-18	4.29e-16
ACGTGTCG	CGACACGT	1.4435e-20	3.59737e-18	4.75e-16
AATTTTAA	TTAAAATT	1.68109e-20	4.15798e-18	5.53e-16
ATAAATTA	TAATTTAT	1.89571e-20	4.65382e-18	6.24e-16
AAAACATT	AATGTTTT	2.70488e-20	6.59109e-18	8.9e-16
ACAAATAA	TTATTTGT	3.09624e-20	7.48926e-18	1.02e-15
AAATTTAT	ATAAATTT	3.28054e-20	7.85913e-18	1.08e-15
GTTTTTAA	TTAAAAAC	3.29694e-20	7.85913e-18	1.08e-15
AATATTTG	CAAATATT	4.07794e-20	9.65093e-18	1.34e-15
AATTTTCT	AGAAAATT	5.38866e-20	1.26618e-17	1.77e-15
GAAATAAA	TTTATTTC	6.11839e-20	1.42745e-17	2.01e-15
ATATCTAA	TTAGATAT	6.85725e-20	1.58856e-17	2.26e-15
AATTAACA	TGTTAATT	7.1724e-20	1.64995e-17	2.36e-15
CAAAAATA	TATTTTTG	7.2814e-20	1.6634e-17	2.4e-15
AATTATTA	TAATAATT	7.40582e-20	1.68015e-17	2.44e-15
GTATTAAA	TTTAATAC	8.94244e-20	2.01487e-17	2.94e-15
TATCTTAA	TTAAGATA	1.02112e-19	2.28508e-17	3.36e-15
AAAAAACG	CGTTTTTT	1.15124e-19	2.55887e-17	3.79e-15
ATATAAAA	TTTTATAT	1.25074e-19	2.76136e-17	4.11e-15
AAGATATT	AATATCTT	1.2724e-19	2.79045e-17	4.19e-15
ATTATTAA	TTAATAAT	1.33162e-19	2.90098e-17	4.38e-15
AAATATCC	GGATATTT	1.35913e-19	2.94145e-17	4.47e-15
ACGCGTAA	TTACGCGT	1.40402e-19	3.01874e-17	4.62e-15
TAATACTA	TAGTATTA	1.71606e-19	3.66567e-17	5.65e-15
AAAGCGCG	CGCGCTTT	2.32496e-19	4.93431e-17	7.65e-15
AAAATTTA	TAAATTTT	2.42707e-19	5.118e-17	7.98e-15
AGCGCGTG	CACGCGCT	3.3097e-19	6.93477e-17	1.09e-14
TTTTAAAA	TTTTAAAA	3.57491e-19	7.44305e-17	1.18e-14
ATACTAAT	ATTAGTAT	3.82809e-19	7.92005e-17	1.26e-14
TAATTATA	TATAATTA	3.96644e-19	8.15499e-17	1.3e-14
CCACGTCA	TGACGTGG	5.56833e-19	1.13774e-16	1.83e-14
CTAATAAA	TTTATTAG	6.68708e-19	1.35789e-16	2.2e-14
AAAAAAGT	ACTTTTTT	8.59726e-19	1.73506e-16	2.83e-14
ACCACGTG	CACGTGGT	1.1021e-18	2.21065e-16	3.63e-14
ACTAATAA	TTATTAGT	2.05086e-18	4.0888e-16	6.75e-14
AACAAAAA	TTTTTGTT	2.12178e-18	4.20471e-16	6.98e-14
ACACGTGT	ACACGTGT	2.19644e-18	4.3266e-16	7.23e-14
CAAAATAA	TTATTTTG	2.51747e-18	4.92944e-16	8.28e-14
GAAAATTA	TAATTTTC	2.5889e-18	5.03932e-16	8.52e-14
CTAAATAA	TTATTTAG	3.15543e-18	6.10595e-16	1.04e-13
ATTATTTG	CAAATAAT	3.18243e-18	6.12217e-16	1.05e-13
CAAATTAA	TTAATTTG	3.32241e-18	6.3543e-16	1.09e-13
ACACGTAT	ATACGTGT	3.3711e-18	6.41016e-16	1.11e-13
ATACAAAT	ATTTGTAT	3.57802e-18	6.76452e-16	1.18e-13
AATATTTA	TAAATATT	4.53183e-18	8.51881e-16	1.49e-13
AATAATGA	TCATTATT	4.90941e-18	9.17614e-16	1.62e-13
ATATATAT	ATATATAT	7.40806e-18	1.3725e-15	2.44e-13
CTAATTAA	TTAATTAG	7.42659e-18	1.3725e-15	2.44e-13
AAAAACAA	TTGTTTTT	8.07273e-18	1.48358e-15	2.66e-13
TAAAATTA	TAATTTTA	1.22001e-17	2.21918e-15	4.01e-13
AAAAAACA	TGTTTTTT	1.22103e-17	2.21918e-15	4.02e-13
AATGAATA	TATTCATT	1.38972e-17	2.51187e-15	4.57e-13
GTTATATA	TATATAAC	1.48028e-17	2.66095e-15	4.87e-13
ACATAAAT	ATTTATGT	1.51931e-17	2.71627e-15	5e-13
AAAAATTT	AAATTTTT	1.67297e-17	2.97481e-15	5.5e-13
ATATTACG	CGTAATAT	1.75377e-17	3.10172e-15	5.77e-13
CAAATATA	TATATTTG	2.04392e-17	3.59555e-15	6.72e-13
ATTAATAC	GTATTAAT	2.14509e-17	3.75346e-15	7.06e-13
TAATTTGA	TCAAATTA	2.71659e-17	4.7283e-15	8.94e-13
AATATAAT	ATTATATT	3.4358e-17	5.94864e-15	1.13e-12
AATTTATA	TATAAATT	3.75673e-17	6.47022e-15	1.24e-12
AAATATAA	TTATATTT	5.13853e-17	8.80401e-15	1.69e-12
CTAAAATA	TATTTTAG	5.55808e-17	9.4735e-15	1.83e-12
TAAATTAA	TTAATTTA	5.82694e-17	9.88057e-15	1.92e-12
AATTATTG	CAATAATT	5.89117e-17	9.93826e-15	1.94e-12
ATTAATGA	TCATTAAT	6.00656e-17	1.00812e-14	1.98e-12
TATCTAAA	TTTAGATA	6.05611e-17	1.01128e-14	1.99e-12
AATAAAAC	GTTTTATT	6.75574e-17	1.12241e-14	2.22e-12
TAAAATGA	TCATTTTA	7.12641e-17	1.17804e-14	2.34e-12
TATATATA	TATATATA	7.82875e-17	1.28767e-14	2.58e-12
AAATATAT	ATATATTT	1.19023e-16	1.94795e-14	3.92e-12
GAATAATA	TATTATTC	1.28175e-16	2.08735e-14	4.22e-12
AAAAAATG	CATTTTTT	1.7021e-16	2.75823e-14	5.6e-12
CGCGTGGA	TCCACGCG	1.73838e-16	2.80322e-14	5.72e-12
CTAATTTA	TAAATTAG	1.77647e-16	2.85067e-14	5.84e-12
TAAGAAAA	TTTTCTTA	1.9419e-16	3.10101e-14	6.39e-12
ATATTTTG	CAAAATAT	1.96349e-16	3.12034e-14	6.46e-12
ATATTAAT	ATTAATAT	2.49296e-16	3.94272e-14	8.2e-12
AAAATATT	AATATTTT	2.51515e-16	3.95877e-14	8.27e-12
TAAAGAAA	TTTCTTTA	2.95238e-16	4.62483e-14	9.71e-12
GTCGGTCA	TGACCGAC	3.10336e-16	4.83829e-14	1.02e-11
AAAAAACT	AGTTTTTT	4.60072e-16	7.13892e-14	1.51e-11
AATATACA	TGTATATT	4.92197e-16	7.60155e-14	1.62e-11
CGCGTAAG	CTTACGCG	6.21506e-16	9.53857e-14	2.04e-11
ATAATTGA	TCAATTAT	6.23417e-16	9.53857e-14	2.05e-11
AATAAAGA	TCTTTATT	6.49829e-16	9.89666e-14	2.14e-11
AAAAATTG	CAATTTTT	6.757e-16	1.02432e-13	2.22e-11
GTATTATA	TATAATAC	6.84278e-16	1.03257e-13	2.25e-11
TAATTGTA	TACAATTA	6.97198e-16	1.04726e-13	2.29e-11
GACAAAAA	TTTTTGTC	7.83193e-16	1.17109e-13	2.58e-11
ACTTAAAT	ATTTAAGT	8.38043e-16	1.24743e-13	2.76e-11
GTTAATTA	TAATTAAC	9.319e-16	1.38089e-13	3.07e-11
AACTAATT	AATTAGTT	1.05142e-15	1.55101e-13	3.46e-11
AAATAAAG	CTTTATTT	1.06195e-15	1.55955e-13	3.49e-11
CAATAATA	TATTATTG	1.22447e-15	1.79023e-13	4.03e-11
ACACGTAA	TTACGTGT	1.89115e-15	2.7527e-13	6.22e-11
AACAAATA	TATTTGTT	1.98337e-15	2.87422e-13	6.52e-11
CACACGTA	TACGTGTG	2.09373e-15	3.02085e-13	6.89e-11
CGACCGAC	GTCGGTCG	2.31014e-15	3.31853e-13	7.6e-11
AGATATTA	TAATATCT	2.48103e-15	3.54852e-13	8.16e-11
ACGTACGA	TCGTACGT	2.50992e-15	3.57431e-13	8.26e-11
ATAAAAGA	TCTTTTAT	2.76165e-15	3.9035e-13	9.08e-11
AAATAATG	CATTATTT	2.76482e-15	3.9035e-13	9.1e-11
AAACACGT	ACGTGTTT	2.80059e-15	3.9371e-13	9.21e-11
AACATTAA	TTAATGTT	2.94733e-15	4.12576e-13	9.7e-11
TCTAATAA	TTATTAGA	2.97553e-15	4.14758e-13	9.79e-11
GACGTGGC	GCCACGTC	3.0478e-15	4.2304e-13	<1E-10
GTGTTATA	TATAACAC	3.25799e-15	4.50315e-13	<1E-10
ATTTTGAC	GTCAAAAT	3.96975e-15	5.46396e-13	<1E-10
TTGACCAA	TTGGTCAA	4.30077e-15	5.89492e-13	<1E-10
AAACAAAA	TTTTGTTT	5.09217e-15	6.9507e-13	<1E-10
ATACATAT	ATATGTAT	5.60392e-15	7.61763e-13	<1E-10
ACTATAGT	ACTATAGT	6.31032e-15	8.54257e-13	<1E-10
AACGCGTC	GACGCGTT	6.66848e-15	8.99042e-13	<1E-10
ATCAAATA	TATTTGAT	6.83021e-15	9.17088e-13	<1E-10
AACACGTG	CACGTGTT	7.28336e-15	9.73956e-13	<1E-10
AATTTTTA	TAAAAATT	7.67616e-15	1.02233e-12	<1E-10
ACAAATTA	TAATTTGT	7.87531e-15	1.04462e-12	<1E-10
AGTATTAA	TTAATACT	8.06127e-15	1.06499e-12	<1E-10
AAAATACA	TGTATTTT	9.23278e-15	1.21489e-12	<1E-10
AAGAAAAA	TTTTTCTT	9.29214e-15	1.21783e-12	<1E-10
TACGTATA	TATACGTA	1.03596e-14	1.35234e-12	<1E-10
AAACGTGT	ACACGTTT	1.06437e-14	1.38394e-12	<1E-10
AATAATAG	CTATTATT	1.12502e-14	1.45704e-12	<1E-10
CACGTGGA	TCCACGTG	1.40321e-14	1.8102e-12	<1E-10
GGTCCCAC	GTGGGACC	1.44748e-14	1.86001e-12	<1E-10
TACTAATA	TATTAGTA	1.46822e-14	1.87932e-12	<1E-10
AACTAATA	TATTAGTT	1.6059e-14	2.04759e-12	<1E-10
ACAATTAA	TTAATTGT	1.82509e-14	2.31807e-12	<1E-10
TAATATAA	TTATATTA	1.94568e-14	2.46173e-12	<1E-10
ACGCGTTG	CAACGCGT	1.96046e-14	2.47093e-12	<1E-10
ATATCTTA	TAAGATAT	1.97035e-14	2.47392e-12	<1E-10
AATAAATG	CATTTATT	2.03281e-14	2.54263e-12	<1E-10
ATAGTATA	TATACTAT	2.22971e-14	2.77836e-12	<1E-10
AATTAATG	CATTAATT	2.29617e-14	2.85037e-12	<1E-10
ACATACGT	ACGTATGT	2.31416e-14	2.8619e-12	<1E-10
AAAAATTA	TAATTTTT	2.32912e-14	2.86961e-12	<1E-10
GACAAATA	TATTTGTC	2.81448e-14	3.45467e-12	<1E-10
CGTAATTA	TAATTACG	2.95802e-14	3.61736e-12	<1E-10
ACTATTAT	ATAATAGT	3.00957e-14	3.66678e-12	<1E-10
GGAAATAA	TTATTTCC	3.20731e-14	3.88545e-12	<1E-10
ATATGTAA	TTACATAT	3.21268e-14	3.88545e-12	<1E-10
AAAACAAA	TTTGTTTT	3.85689e-14	4.63402e-12	<1E-10
AATAATAC	GTATTATT	3.85981e-14	4.63402e-12	<1E-10
GACCCCAC	GTGGGGTC	3.87719e-14	4.63797e-12	<1E-10
CTATAATA	TATTATAG	4.67613e-14	5.57341e-12	<1E-10
TAAAACTA	TAGTTTTA	4.79785e-14	5.69784e-12	<1E-10
AATTATAT	ATATAATT	5.10406e-14	6.03968e-12	<1E-10
ATACTTAA	TTAAGTAT	5.65071e-14	6.66258e-12	<1E-10
TATATAAA	TTTATATA	6.15605e-14	7.23248e-12	<1E-10
AGAAAAAT	ATTTTTCT	6.39494e-14	7.4864e-12	<1E-10
CACGTACG	CGTACGTG	6.54134e-14	7.63063e-12	<1E-10
AAAAGTCT	AGACTTTT	7.20882e-14	8.37955e-12	<1E-10
AATACTAA	TTAGTATT	7.25624e-14	8.40498e-12	<1E-10
TAAATATA	TATATTTA	7.56303e-14	8.72959e-12	<1E-10
AATATATG	CATATATT	7.60041e-14	8.74207e-12	<1E-10
ATTTTGGA	TCCAAAAT	8.03742e-14	9.21251e-12	<1E-10
AAATACTA	TAGTATTT	8.746e-14	9.98988e-12	<1E-10
GAAAAATA	TATTTTTC	9.43111e-14	1.07351e-11	<1E-10
AATAAATT	AATTTATT	1.09702e-13	1.2444e-11	<1E-10
AATACATA	TATGTATT	1.18729e-13	1.34216e-11	<1E-10
GTTTAATA	TATTAAAC	1.24724e-13	1.40511e-11	<1E-10
ATAAAAAG	CTTTTTAT	1.27255e-13	1.42873e-11	<1E-10
ACTATTTA	TAAATAGT	1.48573e-13	1.6624e-11	<1E-10
AAAATTTT	AAAATTTT	1.52936e-13	1.70542e-11	<1E-10
AAAACGCG	CGCGTTTT	1.72875e-13	1.92124e-11	<1E-10
AATACTAT	ATAGTATT	1.73538e-13	1.92212e-11	<1E-10
CTATTTGA	TCAAATAG	1.88465e-13	2.08045e-11	<1E-10
AACATAAA	TTTATGTT	1.95397e-13	2.14976e-11	<1E-10
AAAGAAAT	ATTTCTTT	2.0117e-13	2.20589e-11	<1E-10
ATTAATTC	GAATTAAT	2.43126e-13	2.65711e-11	<1E-10
AATATTCA	TGAATATT	2.44485e-13	2.6631e-11	<1E-10
GAATTTAA	TTAAATTC	2.47017e-13	2.6818e-11	<1E-10
AAAATAAG	CTTATTTT	2.56398e-13	2.77449e-11	<1E-10
TATACATA	TATGTATA	2.66665e-13	2.87613e-11	<1E-10
AAACTATT	AATAGTTT	2.71853e-13	2.92251e-11	<1E-10
ACAAAAAT	ATTTTTGT	2.73265e-13	2.92812e-11	<1E-10
TGTATTAA	TTAATACA	3.54809e-13	3.78955e-11	<1E-10
GATAAATA	TATTTATC	3.67009e-13	3.90716e-11	<1E-10
AATTAGTC	GACTAATT	3.73819e-13	3.96682e-11	<1E-10
AAAATAGT	ACTATTTT	3.78246e-13	4.0009e-11	<1E-10
TACTTTAA	TTAAAGTA	3.82431e-13	4.0322e-11	<1E-10
AAATGAAA	TTTCATTT	4.04607e-13	4.25238e-11	<1E-10
ACAATAAT	ATTATTGT	4.41374e-13	4.62402e-11	<1E-10
AAACAATA	TATTGTTT	4.65005e-13	4.85613e-11	<1E-10
ATGTTATA	TATAACAT	4.68851e-13	4.8808e-11	<1E-10
ACTTTTAA	TTAAAAGT	5.59325e-13	5.80428e-11	<1E-10
CACGTATG	CATACGTG	6.46846e-13	6.69139e-11	<1E-10
ACGTGGCC	GGCCACGT	6.75761e-13	6.9686e-11	<1E-10
ATTAAAAG	CTTTTAAT	7.08377e-13	7.28211e-11	<1E-10
ATACTATA	TATAGTAT	7.34194e-13	7.52401e-11	<1E-10
CCACGTGG	CCACGTGG	7.45015e-13	7.61118e-11	<1E-10
AATATTAC	GTAATATT	7.6609e-13	7.80226e-11	<1E-10
CCACATAA	TTATGTGG	9.27549e-13	9.41748e-11	<1E-10
GGGTCCCA	TGGGACCC	9.826e-13	9.94572e-11	<1E-10
$down

## Sheet: hexamers_FC2
$up
k-mer	k-mer (reverse)	MetaPvalue	PBH	Pbonferroni
ACGCGT	ACGCGT	9.30814e-77	1.93609e-73	1.93609e-73
ACGTGG	CCACGT	2.73156e-50	2.84082e-47	5.68165e-47
TAATTA	TAATTA	1.43908e-42	9.97764e-40	2.99329e-39
ATTAAT	ATTAAT	1.38517e-41	7.20287e-39	2.88115e-38
CACGTG	CACGTG	1.90216e-41	7.91298e-39	3.95649e-38
AATTAT	ATAATT	2.17303e-38	7.53317e-36	4.5199e-35
ACACGT	ACGTGT	6.24125e-38	1.85454e-35	1.29818e-34
TATTAA	TTAATA	1.39556e-37	3.62847e-35	2.90277e-34
ATATAT	ATATAT	1.90723e-37	4.40783e-35	3.96704e-34
AACGCG	CGCGTT	9.72964e-36	2.02377e-33	2.02377e-32
TAAATA	TATTTA	1.98772e-34	3.7586e-32	4.13446e-31
ATTTTA	TAAAAT	4.02548e-34	6.9775e-32	8.37301e-31
CACGTA	TACGTG	1.56871e-33	2.50994e-31	3.26292e-30
AATATT	AATATT	4.9429e-33	7.34374e-31	1.02812e-29
TATATA	TATATA	1.16338e-32	1.61321e-30	2.41982e-29
ATATTA	TAATAT	1.24479e-32	1.61823e-30	2.58917e-29
CGCGTA	TACGCG	1.68046e-32	2.05609e-30	3.49535e-29
GTATTA	TAATAC	1.97969e-32	2.28765e-30	4.11776e-29
TTATAA	TTATAA	6.03605e-31	6.60788e-29	1.2555e-27
ATTATA	TATAAT	3.25582e-30	3.38605e-28	6.7721e-27
ATAAAT	ATTTAT	5.99956e-30	5.94242e-28	1.24791e-26
TAGATA	TATCTA	9.65139e-30	9.12495e-28	2.00749e-26
TAATAA	TTATTA	3.75542e-29	3.39621e-27	7.81128e-26
CAATTA	TAATTG	8.0993e-28	7.01939e-26	1.68465e-24
AATAAT	ATTATT	1.34749e-27	1.12111e-25	2.80277e-24
AAATAA	TTATTT	3.11309e-26	2.49047e-24	6.47523e-23
AATATC	GATATT	9.05662e-26	6.97696e-24	1.88378e-22
ACGTAT	ATACGT	2.75818e-25	2.04894e-23	5.73702e-22
TTAAAA	TTTTAA	5.04622e-25	3.61936e-23	1.04961e-21
AAATTT	AAATTT	1.63e-24	1.13014e-22	3.39041e-21
AAAATA	TATTTT	1.79793e-24	1.20635e-22	3.73969e-21
AATTAA	TTAATT	2.0193e-24	1.31254e-22	4.20014e-21
AAATTA	TAATTT	2.33231e-23	1.47006e-21	4.85121e-20
ACTAAT	ATTAGT	7.91531e-23	4.84231e-21	1.64638e-19
ATTAAA	TTTAAT	8.69374e-23	5.16657e-21	1.8083e-19
ACGCGG	CCGCGT	1.23135e-22	7.11446e-21	2.56121e-19
ACGTAA	TTACGT	1.59366e-22	8.95895e-21	3.31481e-19
ATTACG	CGTAAT	2.48315e-22	1.3592e-20	5.16496e-19
AATATG	CATATT	8.09249e-22	4.31599e-20	1.68324e-18
AAATAT	ATATTT	1.02554e-21	5.33282e-20	2.13313e-18
CGTATA	TATACG	1.14458e-21	5.80664e-20	2.38072e-18
AATATA	TATATT	1.20787e-21	5.98185e-20	2.51238e-18
AATTTA	TAAATT	1.39124e-21	6.72973e-20	2.89378e-18
CGTGTC	GACACG	1.85222e-21	8.75594e-20	3.85261e-18
ATATAA	TTATAT	9.4812e-21	4.38242e-19	1.97209e-17
CTAATA	TATTAG	1.51504e-20	6.85061e-19	3.15128e-17
GATATA	TATATC	2.48203e-20	1.08608e-18	5.16262e-17
ATTTAA	TTAAAT	2.50634e-20	1.08608e-18	5.21318e-17
ACGCGC	GCGCGT	3.72929e-20	1.58305e-18	7.75693e-17
ATAATA	TATTAT	1.3054e-19	5.43048e-18	2.71524e-16
ATATTC	GAATAT	1.37675e-19	5.61497e-18	2.86364e-16
AATAAA	TTTATT	6.55836e-19	2.62334e-17	1.36414e-15
AAAATT	AATTTT	1.52774e-18	5.99567e-17	3.17771e-15
AATTAG	CTAATT	1.56082e-18	6.01205e-17	3.24651e-15
CGTGGC	GCCACG	2.65758e-18	1.00505e-16	5.52778e-15
CGCGTC	GACGCG	4.51568e-18	1.67725e-16	9.39262e-15
TTTAAA	TTTAAA	1.08814e-17	3.97075e-16	2.26333e-14
GTTATA	TATAAC	1.44059e-17	5.16624e-16	2.99642e-14
AATACT	AGTATT	3.60458e-17	1.27077e-15	7.49753e-14
CACACG	CGTGTG	5.57406e-17	1.93234e-15	1.1594e-13
TATAAA	TTTATA	5.89394e-17	2.00974e-15	1.22594e-13
GAATAA	TTATTC	8.10108e-17	2.71778e-15	1.68502e-13
AATAGT	ACTATT	1.58733e-16	5.2407e-15	3.30164e-13
AATTTG	CAAATT	2.27208e-16	7.38425e-15	4.72592e-13
AGATAT	ATATCT	7.06472e-16	2.26071e-14	1.46946e-12
AATTGT	ACAATT	1.92063e-15	6.05291e-14	3.99492e-12
ATACTA	TAGTAT	2.0852e-15	6.47347e-14	4.33722e-12
ACTTAA	TTAAGT	5.53926e-15	1.69436e-13	1.15217e-11
TATTCA	TGAATA	7.62351e-15	2.2981e-13	1.58569e-11
TACGAA	TTCGTA	8.91459e-15	2.64891e-13	1.85424e-11
AATACG	CGTATT	1.67581e-14	4.90941e-13	3.48569e-11
ATAGTA	TACTAT	1.80234e-14	5.20676e-13	3.74887e-11
CAACTA	TAGTTG	2.26301e-14	6.44803e-13	4.70706e-11
AAAAGT	ACTTTT	2.41772e-14	6.79574e-13	5.02885e-11
ATCATA	TATGAT	2.47348e-14	6.85979e-13	5.14484e-11
CACGCG	CGCGTG	3.25135e-14	8.89843e-13	6.7628e-11
ACGAAT	ATTCGT	3.36766e-14	9.09706e-13	7.00474e-11
TAAAAA	TTTTTA	4.17921e-14	1.11446e-12	8.69275e-11
CATAAA	TTTATG	4.49511e-14	1.18352e-12	9.34982e-11
GTACTA	TAGTAC	1.10173e-13	2.8645e-12	<1E-10
ACGTTA	TAACGT	1.16193e-13	2.98371e-12	<1E-10
AAAAAA	TTTTTT	1.58077e-13	4.00975e-12	<1E-10
GGTCAA	TTGACC	1.70573e-13	4.2746e-12	<1E-10
TAGACA	TGTCTA	1.81674e-13	4.49858e-12	<1E-10
ACACAT	ATGTGT	1.84053e-13	4.50389e-12	<1E-10
GCCGAC	GTCGGC	2.36837e-13	5.72815e-12	<1E-10
ACCGAC	GTCGGT	2.58197e-13	6.14568e-12	<1E-10
ACTTAT	ATAAGT	2.6001e-13	6.14568e-12	<1E-10
ACAAAT	ATTTGT	3.2905e-13	7.69016e-12	<1E-10
GAAAAA	TTTTTC	5.0816e-13	1.17441e-11	<1E-10
ACTATA	TATAGT	5.17538e-13	1.18294e-11	<1E-10
CAAATA	TATTTG	8.35821e-13	1.88968e-11	<1E-10
AAACGT	ACGTTT	8.86219e-13	1.98208e-11	<1E-10
GTCAAA	TTTGAC	9.5196e-13	2.10646e-11	<1E-10
ATTATG	CATAAT	1.16861e-12	2.55863e-11	<1E-10
GTCGAC	GTCGAC	1.26018e-12	2.7304e-11	<1E-10
ATAATC	GATTAT	1.32975e-12	2.85142e-11	<1E-10
CCGACA	TGTCGG	2.22689e-12	4.72646e-11	<1E-10
GTGATA	TATCAC	2.28575e-12	4.80239e-11	<1E-10
TAAGTA	TACTTA	2.48681e-12	5.17257e-11	<1E-10
TAAACA	TGTTTA	2.7687e-12	5.70187e-11	<1E-10
AGTATA	TATACT	3.18651e-12	6.49799e-11	<1E-10
TATCAA	TTGATA	3.36619e-12	6.79774e-11	<1E-10
ACATAT	ATATGT	3.79834e-12	7.59667e-11	<1E-10
ATTTAG	CTAAAT	3.842e-12	7.61082e-11	<1E-10
CGTACG	CGTACG	4.6485e-12	9.12026e-11	<1E-10
AAATTC	GAATTT	4.69168e-12	9.12026e-11	<1E-10
AAATAC	GTATTT	4.79288e-12	9.23073e-11	<1E-10
$down

## Sheet: septamers_FC2
$up
k-mer	k-mer (reverse)	MetaPvalue	PBH	Pbonferroni
AAATATC	GATATTT	7.78036e-77	6.37367e-73	6.37367e-73
AACGCGT	ACGCGTT	2.67277e-63	1.09477e-59	2.18953e-59
AAAATAA	TTATTTT	3.35103e-56	9.15055e-53	2.74516e-52
TAATTAA	TTAATTA	1.16086e-54	2.37745e-51	9.5098e-51
AATTAAA	TTTAATT	1.1495e-51	1.88335e-48	9.41673e-48
AAATAAA	TTTATTT	7.4451e-48	1.0165e-44	6.09902e-44
AATTAAT	ATTAATT	4.01015e-47	4.69302e-44	3.28511e-43
AAAAATA	TATTTTT	8.93263e-47	9.14701e-44	7.31761e-43
TATTTAA	TTAAATA	5.99974e-46	5.46109e-43	4.91499e-42
ATAAAAT	ATTTTAT	1.03656e-45	8.49154e-43	8.49154e-42
TATAATA	TATTATA	1.38225e-45	1.0294e-42	1.13234e-41
AATAATT	AATTATT	3.28053e-45	2.23951e-42	2.68741e-41
ATAAAAA	TTTTTAT	1.39622e-44	8.79831e-42	1.14378e-40
AATATTA	TAATATT	1.95652e-44	1.14484e-41	1.60278e-40
ATAATAT	ATATTAT	2.12559e-44	1.16085e-41	1.74128e-40
ATTAAAT	ATTTAAT	2.07863e-42	1.06426e-39	1.70282e-38
TAAAATA	TATTTTA	2.83524e-42	1.36625e-39	2.32263e-38
AAATAAT	ATTATTT	3.33811e-42	1.51921e-39	2.73458e-38
AATATCT	AGATATT	1.9023e-41	8.2019e-39	1.55836e-37
AATAATA	TATTATT	6.28827e-41	2.57567e-38	5.15135e-37
TATTAAA	TTTAATA	1.05945e-40	4.13287e-38	8.67903e-37
AATTTTA	TAAAATT	1.43738e-40	5.35229e-38	1.1775e-36
AATAAAA	TTTTATT	2.53011e-40	9.0116e-38	2.07267e-36
TAAAAAA	TTTTTTA	2.89889e-40	9.89487e-38	2.37477e-36
ACGCGTA	TACGCGT	1.11731e-39	3.66118e-37	9.15296e-36
ACGTGGC	GCCACGT	1.21643e-39	3.83268e-37	9.96498e-36
AATTAGT	ACTAATT	7.35799e-39	2.23247e-36	6.02766e-35
TAAATAA	TTATTTA	6.41564e-38	1.87703e-35	5.25569e-34
ATTAAAA	TTTTAAT	3.52156e-37	9.94781e-35	2.88486e-33
AAAATAT	ATATTTT	5.80163e-37	1.58423e-34	4.7527e-33
AAAATTA	TAATTTT	5.99784e-37	1.58498e-34	4.91343e-33
ATTATTA	TAATAAT	7.35941e-37	1.88401e-34	6.02883e-33
ATATTTA	TAAATAT	9.34565e-37	2.31999e-34	7.65595e-33
AATTTAA	TTAAATT	1.33573e-36	3.21832e-34	1.09423e-32
TTAATAA	TTATTAA	2.02204e-36	4.73273e-34	1.65646e-32
ATTTTTA	TAAAAAT	2.61678e-36	5.95462e-34	2.14366e-32
TAATAAA	TTTATTA	2.87695e-36	6.36972e-34	2.3568e-32
TTAAAAA	TTTTTAA	7.24468e-36	1.5618e-33	5.93484e-32
AAATTAA	TTAATTT	1.04993e-35	2.20539e-33	8.60101e-32
AAATTTA	TAAATTT	1.09091e-35	2.23418e-33	8.93672e-32
AAAATTT	AAATTTT	1.50826e-34	3.01358e-32	1.23557e-30
TATATAA	TTATATA	1.86038e-34	3.62862e-32	1.52402e-30
ATATATA	TATATAT	2.46033e-34	4.68721e-32	2.0155e-30
ATATAAT	ATTATAT	9.30166e-34	1.7318e-31	7.61992e-30
ATAAATA	TATTTAT	1.03044e-33	1.87585e-31	8.44134e-30
AAATATT	AATATTT	1.1752e-33	2.09288e-31	9.62726e-30
ACACGTG	CACGTGT	1.54138e-33	2.68659e-31	1.2627e-29
TATAAAA	TTTTATA	3.2044e-33	5.46884e-31	2.62504e-29
ATTTTAA	TTAAAAT	3.53328e-33	5.90707e-31	2.89446e-29
AATAAAT	ATTTATT	1.06927e-32	1.75189e-30	8.75947e-29
ATAATAA	TTATTAT	1.39625e-32	2.24276e-30	1.14381e-28
CACGTGG	CCACGTG	6.74329e-32	1.06233e-29	5.5241e-28
ATTATAA	TTATAAT	2.53953e-31	3.92525e-29	2.08038e-27
AAAAAAA	TTTTTTT	3.33271e-31	5.05584e-29	2.73015e-27
AATTTAT	ATAAATT	3.83263e-31	5.70853e-29	3.13969e-27
ATTAATA	TATTAAT	9.61657e-31	1.40677e-28	7.87789e-27
ATAATTA	TAATTAT	1.10301e-30	1.58523e-28	9.03583e-27
ATTTAAA	TTTAAAT	1.28595e-30	1.81629e-28	1.05345e-26
AATATAT	ATATATT	1.19812e-29	1.66356e-27	9.81499e-26
AAAAAAG	CTTTTTT	3.59445e-29	4.90762e-27	2.94457e-25
ATATTTG	CAAATAT	1.39245e-28	1.86999e-26	1.1407e-24
CGCGTTA	TAACGCG	1.4965e-28	1.97731e-26	1.22593e-24
AATTATA	TATAATT	2.60277e-28	3.38443e-26	2.13219e-24
ATATTAA	TTAATAT	5.73223e-28	7.33726e-26	4.69584e-24
TTATAAA	TTTATAA	1.07151e-27	1.35043e-25	8.77782e-24
ATATCTA	TAGATAT	1.23297e-27	1.53037e-25	1.01005e-23
ACAAAAA	TTTTTGT	1.29574e-27	1.58429e-25	1.06147e-23
TTTAAAA	TTTTAAA	2.06253e-27	2.48474e-25	1.68962e-23
TATCTAA	TTAGATA	5.15063e-26	6.11507e-24	4.2194e-22
AAATATA	TATATTT	7.27579e-26	8.51476e-24	5.96033e-22
TAATATA	TATATTA	8.16389e-26	9.41952e-24	6.68786e-22
TAAATTA	TAATTTA	1.15859e-25	1.31822e-23	9.4912e-22
TAGAAAA	TTTTCTA	3.21507e-24	3.60793e-22	2.63379e-20
AATACTA	TAGTATT	7.69476e-24	8.51831e-22	6.30355e-20
AAAAAAT	ATTTTTT	1.17204e-23	1.28018e-21	9.60138e-20
ACGTGTC	GACACGT	1.34345e-23	1.44809e-21	1.10055e-19
TATAACA	TGTTATA	3.28378e-23	3.4936e-21	2.69007e-19
GTATTAA	TTAATAC	1.3122e-22	1.37815e-20	1.07496e-18
CGCGTAA	TTACGCG	6.18747e-22	6.41618e-20	5.06878e-18
ACAAATA	TATTTGT	6.75033e-22	6.91234e-20	5.52987e-18
ACGCGCT	AGCGCGT	9.36952e-22	9.47594e-20	7.67551e-18
AAAAATT	AATTTTT	1.19846e-21	1.19729e-19	9.81781e-18
AAAAAAC	GTTTTTT	1.71748e-21	1.69513e-19	1.40696e-17
CAAAATA	TATTTTG	2.67631e-21	2.61004e-19	2.19244e-17
CAAAAAA	TTTTTTG	3.08501e-21	2.97322e-19	2.52724e-17
ACGTGTG	CACACGT	3.52816e-21	3.36078e-19	2.89027e-17
AATTTTG	CAAAATT	6.17842e-21	5.81766e-19	5.06136e-17
CAAATAA	TTATTTG	6.88326e-21	6.40769e-19	5.63877e-17
AATATTC	GAATATT	1.65842e-20	1.52649e-18	1.35858e-16
GAAATAA	TTATTTC	2.66519e-20	2.42186e-18	2.18332e-16
AGTATTA	TAATACT	2.6903e-20	2.42186e-18	2.20389e-16
ACTAATA	TATTAGT	3.14254e-20	2.79822e-18	2.57436e-16
ATTTATG	CATAAAT	3.526e-20	3.10592e-18	2.8885e-16
ACGCGTC	GACGCGT	3.86726e-20	3.37027e-18	3.16806e-16
CAAATTA	TAATTTG	4.34889e-20	3.75012e-18	3.56261e-16
ACGTGGA	TCCACGT	4.47794e-20	3.82117e-18	3.66833e-16
AAACGCG	CGCGTTT	1.46903e-19	1.2368e-17	1.20343e-15
CCACGTC	GACGTGG	1.47957e-19	1.2368e-17	1.21206e-15
AACAAAT	ATTTGTT	2.24907e-19	1.86105e-17	1.84244e-15
AAATTAT	ATAATTT	2.40509e-19	1.97025e-17	1.97025e-15
CGTGGCA	TGCCACG	3.56048e-19	2.88787e-17	2.91675e-15
ATTATTG	CAATAAT	4.06787e-19	3.26706e-17	3.3324e-15
CCACGTA	TACGTGG	4.21146e-19	3.34954e-17	3.45003e-15
ATATTCA	TGAATAT	5.58529e-19	4.39949e-17	4.57547e-15
TATCAAA	TTTGATA	6.61605e-19	5.16178e-17	5.41987e-15
ACAATTA	TAATTGT	9.30146e-19	7.18845e-17	7.61976e-15
AATTTGT	ACAAATT	1.55728e-18	1.19226e-16	1.27572e-14
ACCGCGT	ACGCGGT	3.96895e-18	3.01052e-16	3.25136e-14
CTAATTA	TAATTAG	4.14114e-18	3.11232e-16	3.39243e-14
TAGACAA	TTGTCTA	9.18734e-18	6.84206e-16	7.52627e-14
AACACGT	ACGTGTT	9.35524e-18	6.90433e-16	7.66381e-14
AAATATG	CATATTT	1.32875e-17	9.71885e-16	1.08851e-13
CTATTTA	TAAATAG	2.40749e-17	1.74532e-15	1.97221e-13
AAATAGT	ACTATTT	3.12633e-17	2.24657e-15	2.56109e-13
ATATAAA	TTTATAT	3.65312e-17	2.60229e-15	2.99263e-13
ACACGTA	TACGTGT	4.1517e-17	2.93196e-15	3.40107e-13
TAATTGA	TCAATTA	6.82228e-17	4.77676e-15	5.58881e-13
ATACTAT	ATAGTAT	1.00305e-16	6.96355e-15	8.21699e-13
GAAAATA	TATTTTC	1.10432e-16	7.60215e-15	9.04656e-13
ACTACTA	TAGTAGT	1.29726e-16	8.85598e-15	1.06272e-12
AAAAGTC	GACTTTT	1.62572e-16	1.10065e-14	1.33179e-12
AAATGAA	TTCATTT	1.69984e-16	1.1414e-14	1.39251e-12
CACGTAA	TTACGTG	1.71869e-16	1.14468e-14	1.40795e-12
ATTATTC	GAATAAT	1.89881e-16	1.25444e-14	1.5555e-12
ACCACGT	ACGTGGT	2.25571e-16	1.4783e-14	1.84788e-12
ACATAAA	TTTATGT	2.43909e-16	1.5858e-14	1.9981e-12
AATATAA	TTATATT	4.38267e-16	2.82699e-14	3.59028e-12
ATATATC	GATATAT	4.83808e-16	3.09637e-14	3.96336e-12
ATAATTG	CAATTAT	4.97615e-16	3.16005e-14	4.07646e-12
ATAATAC	GTATTAT	5.30844e-16	3.34513e-14	4.34867e-12
ATTTTTG	CAAAAAT	6.06289e-16	3.79139e-14	4.96672e-12
ATATGTA	TACATAT	7.1435e-16	4.4333e-14	5.85196e-12
ACTATTA	TAATAGT	1.27605e-15	7.85972e-14	1.04534e-11
AGAAAAA	TTTTTCT	1.37171e-15	8.37099e-14	1.1237e-11
ATACGTG	CACGTAT	1.3795e-15	8.37099e-14	1.13008e-11
AACATAT	ATATGTT	1.89173e-15	1.13949e-13	1.54971e-11
CCACGCG	CGCGTGG	1.97919e-15	1.18347e-13	1.62135e-11
ATACTTA	TAAGTAT	2.07876e-15	1.234e-13	1.70292e-11
ACTTAAT	ATTAAGT	2.73806e-15	1.61368e-13	2.24302e-11
AATATGA	TCATATT	3.20589e-15	1.8759e-13	2.62627e-11
CATATTA	TAATATG	3.61134e-15	2.09817e-13	2.95841e-11
GTCGACA	TGTCGAC	4.54656e-15	2.62292e-13	3.72454e-11
GACCGAC	GTCGGTC	6.31854e-15	3.61969e-13	5.17615e-11
AAAATTG	CAATTTT	7.19751e-15	4.09458e-13	5.8962e-11
AAGAAAA	TTTTCTT	8.22036e-15	4.64422e-13	6.73412e-11
AGAAAAT	ATTTTCT	9.0872e-15	5.09879e-13	7.44424e-11
AAAAACT	AGTTTTT	1.15135e-14	6.41622e-13	9.43185e-11
GACAAAA	TTTTGTC	1.84378e-14	1.02056e-12	<1E-10
ATTAGTA	TACTAAT	1.8675e-14	1.02675e-12	<1E-10
CTAAATA	TATTTAG	2.13298e-14	1.16489e-12	<1E-10
AATAATG	CATTATT	2.3294e-14	1.26374e-12	<1E-10
ACTAAAT	ATTTAGT	3.7473e-14	2.0196e-12	<1E-10
TGGTCAA	TTGACCA	4.22174e-14	2.26043e-12	<1E-10
TACTTAA	TTAAGTA	4.50155e-14	2.39459e-12	<1E-10
GGACCCA	TGGGTCC	4.79727e-14	2.53543e-12	<1E-10
ATATTAG	CTAATAT	4.97667e-14	2.61339e-12	<1E-10
TAATACA	TGTATTA	5.1451e-14	2.68463e-12	<1E-10
TATTAGA	TCTAATA	5.21439e-14	2.70356e-12	<1E-10
CAATTAA	TTAATTG	5.93348e-14	3.05705e-12	<1E-10
ACGCGTG	CACGCGT	7.05163e-14	3.61043e-12	<1E-10
GTGGATA	TATCCAC	7.25298e-14	3.68166e-12	<1E-10
GTTATAA	TTATAAC	7.28062e-14	3.68166e-12	<1E-10
ATGTTTA	TAAACAT	7.5255e-14	3.78214e-12	<1E-10
CGTAATA	TATTACG	1.05047e-13	5.2159e-12	<1E-10
AATATAC	GTATATT	1.05057e-13	5.2159e-12	<1E-10
AAAAAGT	ACTTTTT	1.19291e-13	5.88692e-12	<1E-10
AATTTAG	CTAAATT	1.29435e-13	6.34927e-12	<1E-10
ACAAAAT	ATTTTGT	1.38809e-13	6.7686e-12	<1E-10
AACTAAT	ATTAGTT	1.46249e-13	7.08919e-12	<1E-10
TATCATA	TATGATA	1.58805e-13	7.65255e-12	<1E-10
ATTCGTA	TACGAAT	1.79381e-13	8.5935e-12	<1E-10
AAATTGT	ACAATTT	1.98356e-13	9.4082e-12	<1E-10
GGGACCC	GGGTCCC	1.98684e-13	9.4082e-12	<1E-10
AATTACG	CGTAATT	2.00084e-13	9.42003e-12	<1E-10
AAAATAC	GTATTTT	2.78905e-13	1.30559e-11	<1E-10
ACTTTTA	TAAAAGT	2.85679e-13	1.3297e-11	<1E-10
CGTGTCA	TGACACG	2.89407e-13	1.33945e-11	<1E-10
AATATCA	TGATATT	3.02723e-13	1.39321e-11	<1E-10
ACCCCAC	GTGGGGT	3.17055e-13	1.45101e-11	<1E-10
AAAAACA	TGTTTTT	3.6203e-13	1.64764e-11	<1E-10
GAATTAA	TTAATTC	3.68109e-13	1.66605e-11	<1E-10
CGTATTA	TAATACG	4.08881e-13	1.84042e-11	<1E-10
GTGATAA	TTATCAC	6.87983e-13	3.07976e-11	<1E-10
ATAATAG	CTATTAT	7.20057e-13	3.20582e-11	<1E-10
CGTGGAA	TTCCACG	7.36426e-13	3.26097e-11	<1E-10
CACGCGC	GCGCGTG	7.72129e-13	3.40069e-11	<1E-10
CAACTTG	CAAGTTG	7.87163e-13	3.44836e-11	<1E-10
CAATTTA	TAAATTG	9.05685e-13	3.94648e-11	<1E-10
GTAATTA	TAATTAC	9.33029e-13	4.03542e-11	<1E-10
ACTAAAA	TTTTAGT	9.35951e-13	4.03542e-11	<1E-10
AATTAAC	GTTAATT	1.12588e-12	4.82892e-11	<1E-10
ATTAATG	CATTAAT	1.263e-12	5.3888e-11	<1E-10
ACTATAG	CTATAGT	1.35241e-12	5.74036e-11	<1E-10
ATATACG	CGTATAT	1.56631e-12	6.61403e-11	<1E-10
AAAACTA	TAGTTTT	2.17205e-12	9.12485e-11	<1E-10
$down

## Sheet: octamers_FC2
$up
k-mer	k-mer (reverse)	MetaPvalue	PBH	Pbonferroni
AAAATATC	GATATTTT	9.40721e-67	3.0946e-62	3.0946e-62
AAATATCT	AGATATTT	5.09646e-62	8.38265e-58	1.67653e-57
TAATTAAA	TTTAATTA	2.68858e-50	2.94811e-46	8.84434e-46
AAAATAAA	TTTATTTT	3.32e-45	2.73037e-41	1.09215e-40
AAATAAAA	TTTTATTT	5.50315e-42	3.62063e-38	1.81032e-37
AATAAAAA	TTTTTATT	2.20213e-40	1.20736e-36	7.24413e-36
ATAAAATA	TATTTTAT	2.83996e-40	1.33462e-36	9.34232e-36
AATATCTA	TAGATATT	2.30191e-39	9.46543e-36	7.57235e-35
TAAAATAA	TTATTTTA	5.79065e-37	2.11655e-33	1.90489e-32
AAAAAAAA	TTTTTTTT	1.00025e-36	3.29042e-33	3.29042e-32
AAATATTA	TAATATTT	1.61329e-35	4.82463e-32	5.3071e-31
ATAATATA	TATATTAT	2.24138e-35	6.14436e-32	7.37323e-31
AATAAATA	TATTTATT	8.51237e-35	2.15402e-31	2.80023e-30
AATAATAT	ATATTATT	1.54509e-34	3.63052e-31	5.08273e-30
AAATAATA	TATTATTT	2.04977e-34	4.49527e-31	6.74291e-30
TTAATAAA	TTTATTAA	2.3498e-34	4.60806e-31	7.7299e-30
TAAAAAAA	TTTTTTTA	2.38136e-34	4.60806e-31	7.83371e-30
AATTAAAA	TTTTAATT	6.70423e-34	1.22524e-30	2.20543e-29
AATAAAAT	ATTTTATT	2.61623e-33	4.52966e-30	8.60636e-29
AAAAATAT	ATATTTTT	4.2761e-33	6.90959e-30	1.40667e-28
ACGCGTTA	TAACGCGT	4.41092e-33	6.90959e-30	1.45101e-28
ATTAAAAA	TTTTTAAT	1.08419e-32	1.62117e-29	3.56657e-28
AAATAATT	AATTATTT	2.09495e-32	2.99633e-29	6.89156e-28
ATATTATA	TATAATAT	3.70912e-31	5.08396e-28	1.22015e-26
ACGTGGCA	TGCCACGT	4.82232e-31	6.3454e-28	1.58635e-26
AAAAATAA	TTATTTTT	5.20576e-31	6.58649e-28	1.71249e-26
TTATAAAA	TTTTATAA	1.1923e-30	1.45266e-27	3.92218e-26
AATATTAA	TTAATATT	1.95483e-30	2.29664e-27	6.4306e-26
TTAAAAAA	TTTTTTAA	2.67708e-30	3.03673e-27	8.80652e-26
ATAAAAAA	TTTTTTAT	6.84589e-30	7.50675e-27	2.25202e-25
TAATAATA	TATTATTA	1.17918e-29	1.2513e-26	3.87904e-25
AAACGCGT	ACGCGTTT	2.50894e-29	2.57919e-26	8.25342e-25
AAAAAATA	TATTTTTT	8.30712e-29	8.28093e-26	2.73271e-24
AAAATAAT	ATTATTTT	8.90777e-29	8.61853e-26	2.9303e-24
ATATATAA	TTATATAT	1.13522e-28	1.06698e-25	3.73442e-24
AATATTAT	ATAATATT	2.14319e-28	1.9584e-25	7.05025e-24
AAATTTTA	TAAAATTT	3.22783e-28	2.86981e-25	1.06183e-23
ATTTTTAA	TTAAAAAT	1.18683e-27	1.02742e-24	3.90419e-23
AAATAAAT	ATTTATTT	1.25972e-27	1.06255e-24	4.14396e-23
AAATATGT	ACATATTT	1.53157e-27	1.25957e-24	5.03827e-23
AATTAAAT	ATTTAATT	2.16265e-27	1.73519e-24	7.11426e-23
ATATTTAA	TTAAATAT	2.69763e-27	2.11288e-24	8.87411e-23
ATATAATA	TATTATAT	2.78806e-27	2.13293e-24	9.1716e-23
TAAAAATA	TATTTTTA	3.29957e-27	2.46688e-24	1.08542e-22
AATAATTA	TAATTATT	4.34025e-27	3.17282e-24	1.42777e-22
AAAAAAAT	ATTTTTTT	4.98177e-27	3.56262e-24	1.6388e-22
ATTAAATA	TATTTAAT	6.42707e-27	4.4984e-24	2.11425e-22
TATAAAAA	TTTTTATA	6.59233e-27	4.51794e-24	2.16861e-22
TTAATTAA	TTAATTAA	1.03106e-26	6.92202e-24	3.39179e-22
ACAAATAT	ATATTTGT	1.33949e-26	8.81278e-24	4.40639e-22
ATTAAAAT	ATTTTAAT	1.50062e-26	9.67928e-24	4.93643e-22
TAATAAAA	TTTTATTA	3.16441e-26	2.00186e-23	1.04097e-21
AAAAAAAG	CTTTTTTT	4.14294e-26	2.57144e-23	1.36286e-21
TAAATAAA	TTTATTTA	7.66074e-26	4.66681e-23	2.52008e-21
ATAATAAA	TTTATTAT	7.82292e-26	4.67896e-23	2.57343e-21
AAAAAAAC	GTTTTTTT	8.23033e-26	4.83473e-23	2.70745e-21
TATTAAAA	TTTTAATA	1.07683e-25	6.21462e-23	3.54233e-21
ACACGTGG	CCACGTGT	1.6354e-25	9.27553e-23	5.3798e-21
ATATATTA	TAATATAT	1.73811e-25	9.69099e-23	5.71768e-21
TTATTAAA	TTTAATAA	3.67321e-25	2.0139e-22	1.20834e-20
ACAAAAAA	TTTTTTGT	5.7927e-25	3.12388e-22	1.90557e-20
TATTTAAA	TTTAAATA	6.71571e-25	3.56322e-22	2.2092e-20
AAAATATA	TATATTTT	1.69236e-24	8.8368e-22	5.56718e-20
ATTATTTA	TAAATAAT	3.66353e-24	1.88305e-21	1.20515e-19
CAAAATTA	TAATTTTG	4.34236e-24	2.19763e-21	1.42846e-19
ACTAATTA	TAATTAGT	5.71104e-24	2.84652e-21	1.8787e-19
ATTTAAAA	TTTTAAAT	6.77923e-24	3.3285e-21	2.23009e-19
AATAATAA	TTATTATT	7.76509e-24	3.75647e-21	2.5544e-19
AACGCGTA	TACGCGTT	8.52207e-24	4.06293e-21	2.80342e-19
CACGTGTC	GACACGTG	1.1556e-23	5.43066e-21	3.80146e-19
AACCGCGT	ACGCGGTT	1.83002e-23	8.47891e-21	6.02002e-19
AATTTAAA	TTTAAATT	4.03364e-23	1.84292e-20	1.32691e-18
AAATATCA	TGATATTT	5.49669e-23	2.47697e-20	1.80819e-18
AAAAAATT	AATTTTTT	6.54961e-23	2.91157e-20	2.15456e-18
ATAATTAA	TTAATTAT	1.06232e-22	4.65949e-20	3.49462e-18
AATTTTAT	ATAAAATT	2.56577e-22	1.11058e-19	8.44037e-18
ATTAATTA	TAATTAAT	3.47437e-22	1.48432e-19	1.14293e-17
ATAATAAT	ATTATTAT	4.66668e-22	1.96814e-19	1.53515e-17
AAAATTAA	TTAATTTT	5.17573e-22	2.1552e-19	1.70261e-17
GATATTTA	TAAATATC	6.37325e-22	2.62068e-19	2.09655e-17
ATAAAAAT	ATTTTTAT	6.51459e-22	2.64573e-19	2.14304e-17
TTTAAAAA	TTTTTAAA	1.4146e-21	5.67497e-19	4.65348e-17
AACGCGTT	AACGCGTT	1.45318e-21	5.75948e-19	4.78037e-17
AATTTAAT	ATTAAATT	1.55172e-21	6.07683e-19	5.10454e-17
AATTATTA	TAATAATT	1.64597e-21	6.37011e-19	5.4146e-17
GGGACCCA	TGGGTCCC	1.69133e-21	6.46952e-19	5.56378e-17
ATTTTAAA	TTTAAAAT	1.8187e-21	6.87678e-19	5.9828e-17
TTAAATAA	TTATTTAA	3.46494e-21	1.29526e-18	1.13983e-16
ATTTATTA	TAATAAAT	3.76158e-21	1.39035e-18	1.23741e-16
AAATTAAA	TTTAATTT	4.53778e-21	1.65861e-18	1.49275e-16
TATAATAA	TTATTATA	4.61612e-21	1.6687e-18	1.51852e-16
AAAAATTT	AAATTTTT	6.97889e-21	2.49541e-18	2.29577e-16
CAAAAAAA	TTTTTTTG	8.46396e-21	2.96988e-18	2.7843e-16
CACGTGGC	GCCACGTG	8.48641e-21	2.96988e-18	2.79169e-16
AAAATTTA	TAAATTTT	1.30807e-20	4.5295e-18	4.30303e-16
ATATTTTA	TAAAATAT	1.8125e-20	6.21084e-18	5.96241e-16
ATATTTTC	GAAAATAT	1.85156e-20	6.27929e-18	6.09091e-16
ATTATAAA	TTTATAAT	1.87797e-20	6.30386e-18	6.17778e-16
TATCTAAA	TTTAGATA	3.12426e-20	1.03814e-17	1.02776e-15
ATATTACG	CGTAATAT	6.27369e-20	2.06379e-17	2.06379e-15
ATATTAAA	TTTAATAT	9.24506e-20	3.01114e-17	3.04125e-15
ACGCGTAA	TTACGCGT	1.37551e-19	4.43615e-17	4.52487e-15
CAAAAATA	TATTTTTG	2.16066e-19	6.90068e-17	7.10771e-15
AAAAAAGA	TCTTTTTT	3.91588e-19	1.23862e-16	1.28817e-14
AATTAATA	TATTAATT	3.98866e-19	1.24237e-16	1.31211e-14
TATTATAA	TTATAATA	4.00324e-19	1.24237e-16	1.31691e-14
AAAATTAT	ATAATTTT	4.76923e-19	1.46625e-16	1.56889e-14
CAAATAAA	TTTATTTG	5.08646e-19	1.5493e-16	1.67324e-14
TATTTTAA	TTAAAATA	5.21914e-19	1.57513e-16	1.71689e-14
ATAAATAT	ATATTTAT	8.57669e-19	2.5649e-16	2.82139e-14
AAATTATT	AATAATTT	9.41691e-19	2.76787e-16	3.09779e-14
AATTTTAA	TTAAAATT	9.42369e-19	2.76787e-16	3.10002e-14
AAGCGCGT	ACGCGCTT	9.72663e-19	2.83157e-16	3.19967e-14
CGCGTAAG	CTTACGCG	9.97188e-19	2.8775e-16	3.28035e-14
AAATTTAA	TTAAATTT	2.63064e-18	7.52499e-16	8.65374e-14
AAACAAAT	ATTTGTTT	2.83281e-18	8.03346e-16	9.31881e-14
AATATATA	TATATATT	3.53573e-18	9.94115e-16	1.16311e-13
AAATTAAT	ATTAATTT	3.77659e-18	1.05284e-15	1.24235e-13
AGCGCGTG	CACGCGCT	4.36586e-18	1.20689e-15	1.4362e-13
ATTATATA	TATATAAT	5.67509e-18	1.55573e-15	1.86688e-13
ATTTAATA	TATTAAAT	5.97707e-18	1.62497e-15	1.96622e-13
ATAATTTA	TAAATTAT	6.48296e-18	1.74806e-15	2.13263e-13
TAGAAAAA	TTTTTCTA	8.86941e-18	2.37102e-15	2.91768e-13
CAAATATA	TATATTTG	8.93744e-18	2.37102e-15	2.94006e-13
CGACCGAC	GTCGGTCG	9.12219e-18	2.40067e-15	3.00084e-13
AAAAAGAA	TTCTTTTT	1.22679e-17	3.20291e-15	4.03566e-13
TATATATA	TATATATA	1.80993e-17	4.68815e-15	5.95395e-13
GTTATATA	TATATAAC	1.87779e-17	4.81319e-15	6.1772e-13
AAACACGT	ACGTGTTT	1.88747e-17	4.81319e-15	6.20902e-13
AAGATATT	AATATCTT	4.05185e-17	1.0185e-14	1.3329e-12
TAATACTA	TAGTATTA	4.05593e-17	1.0185e-14	1.33424e-12
AAATGAAT	ATTCATTT	8.87618e-17	2.21205e-14	2.91991e-12
GAAAAAAA	TTTTTTTC	9.935e-17	2.45731e-14	3.26822e-12
ATTAATAA	TTATTAAT	1.51368e-16	3.71597e-14	4.97939e-12
AGATATTA	TAATATCT	1.77442e-16	4.32381e-14	5.83714e-12
AAAAACAA	TTGTTTTT	2.29302e-16	5.5464e-14	7.5431e-12
AATTTTCT	AGAAAATT	2.58269e-16	6.20147e-14	8.49602e-12
ATTATTTG	CAAATAAT	3.01675e-16	7.19123e-14	9.9239e-12
GTTAATTA	TAATTAAC	3.58583e-16	8.48629e-14	1.17959e-11
ATATCTAA	TTAGATAT	3.62689e-16	8.52216e-14	1.1931e-11
AACAAATT	AATTTGTT	5.01827e-16	1.17079e-13	1.65081e-11
ATTTTTTA	TAAAAAAT	6.62635e-16	1.53507e-13	2.17981e-11
AAATTTAT	ATAAATTT	6.853e-16	1.57648e-13	2.25436e-11
AAAAGAAA	TTTCTTTT	8.3533e-16	1.90827e-13	2.7479e-11
AAATATCC	GGATATTT	8.5591e-16	1.94179e-13	2.8156e-11
CCACGTCA	TGACGTGG	9.18115e-16	2.06865e-13	3.02023e-11
ATTAATTG	CAATTAAT	1.24014e-15	2.77522e-13	4.07957e-11
AATTAATT	AATTAATT	1.46521e-15	3.25672e-13	4.81995e-11
ACGTGTCA	TGACACGT	1.60165e-15	3.53611e-13	5.2688e-11
TAATTATA	TATAATTA	1.92197e-15	4.21502e-13	6.32253e-11
TACGCGTA	TACGCGTA	1.93717e-15	4.2202e-13	6.3725e-11
AATATTTG	CAAATATT	2.17598e-15	4.70928e-13	7.15811e-11
AAAAAACA	TGTTTTTT	2.67747e-15	5.75674e-13	8.80782e-11
AATATAAT	ATTATATT	2.70819e-15	5.78497e-13	8.90885e-11
AATTATAA	TTATAATT	2.853e-15	6.05498e-13	9.38522e-11
ACTATTAT	ATAATAGT	3.2715e-15	6.89866e-13	<1E-10
CGTGGAAA	TTTCCACG	3.53071e-15	7.39784e-13	<1E-10
ATTTTGAC	GTCAAAAT	4.29011e-15	8.93212e-13	<1E-10
GTTTAATA	TATTAAAC	4.85011e-15	1.00345e-12	<1E-10
GAATATTC	GAATATTC	5.25341e-15	1.08004e-12	<1E-10
ACCACGTG	CACGTGGT	5.28593e-15	1.08004e-12	<1E-10
AAAACGCG	CGCGTTTT	5.34452e-15	1.08527e-12	<1E-10
GTATTAAA	TTTAATAC	5.44162e-15	1.0982e-12	<1E-10
AATATTCA	TGAATATT	6.06925e-15	1.21258e-12	<1E-10
ATTTTATA	TATAAAAT	6.08206e-15	1.21258e-12	<1E-10
TTTTAAAA	TTTTAAAA	7.29045e-15	1.44425e-12	<1E-10
AAAAAACT	AGTTTTTT	7.33187e-15	1.44425e-12	<1E-10
AAATATAT	ATATATTT	7.50531e-15	1.46961e-12	<1E-10
AACACGTG	CACGTGTT	8.63323e-15	1.68047e-12	<1E-10
AAATATAC	GTATATTT	8.95857e-15	1.73354e-12	<1E-10
ATGTTATA	TATAACAT	1.15492e-14	2.22177e-12	<1E-10
AACGCGTC	GACGCGTT	1.34645e-14	2.57516e-12	<1E-10
AAGAAAAT	ATTTTCTT	1.61665e-14	3.07407e-12	<1E-10
TTAGAAAA	TTTTCTAA	2.11821e-14	4.00464e-12	<1E-10
ATATAACA	TGTTATAT	2.15624e-14	4.05324e-12	<1E-10
ATATTAAT	ATTAATAT	2.39429e-14	4.47514e-12	<1E-10
ATATAAAA	TTTTATAT	2.48546e-14	4.6193e-12	<1E-10
ACGCGTTG	CAACGCGT	2.60748e-14	4.81886e-12	<1E-10
ACAAAATA	TATTTTGT	4.34704e-14	7.98883e-12	<1E-10
ATTATTAA	TTAATAAT	6.45045e-14	1.17886e-11	<1E-10
ATAATATC	GATATTAT	7.28451e-14	1.32393e-11	<1E-10
AATATACA	TGTATATT	8.41768e-14	1.52147e-11	<1E-10
AATGAATA	TATTCATT	8.51067e-14	1.52987e-11	<1E-10
AAAATTTT	AAAATTTT	8.82745e-14	1.57819e-11	<1E-10
ATACATAT	ATATGTAT	1.1693e-13	2.07921e-11	<1E-10
ATTAATAC	GTATTAAT	1.27493e-13	2.25484e-11	<1E-10
CAAATTAA	TTAATTTG	1.3769e-13	2.42217e-11	<1E-10
AAAAAACG	CGTTTTTT	1.49765e-13	2.62057e-11	<1E-10
AATAAAAC	GTTTTATT	1.54931e-13	2.69661e-11	<1E-10
GAAATAAA	TTTATTTC	1.80898e-13	3.13201e-11	<1E-10
ATAAATAA	TTATTTAT	2.03387e-13	3.50294e-11	<1E-10
CGCGTGGA	TCCACGCG	2.4851e-13	4.25781e-11	<1E-10
AATAATGA	TCATTATT	2.59098e-13	4.41621e-11	<1E-10
GAAAATTA	TAATTTTC	2.83194e-13	4.80203e-11	<1E-10
GAATTTAA	TTAAATTC	3.06194e-13	5.16541e-11	<1E-10
TAAGAAAA	TTTTCTTA	3.23533e-13	5.43008e-11	<1E-10
CACGTGGA	TCCACGTG	3.4287e-13	5.7254e-11	<1E-10
AATTATTG	CAATAATT	3.83425e-13	6.37028e-11	<1E-10
AAAGAAAA	TTTTCTTT	3.93093e-13	6.49808e-11	<1E-10
AAATATAA	TTATATTT	3.96787e-13	6.52634e-11	<1E-10
GTATTATA	TATAATAC	4.16685e-13	6.81953e-11	<1E-10
AAATAATG	CATTATTT	4.19354e-13	6.82924e-11	<1E-10
TTGACCAA	TTGGTCAA	4.34888e-13	7.04732e-11	<1E-10
GTTTTTAA	TTAAAAAC	4.44191e-13	7.1628e-11	<1E-10
ACAATTAA	TTAATTGT	4.87882e-13	7.82896e-11	<1E-10
ATCAAATA	TATTTGAT	5.04239e-13	8.05216e-11	<1E-10
AAAATATT	AATATTTT	5.24544e-13	8.33594e-11	<1E-10
TTCTAGAA	TTCTAGAA	5.64096e-13	8.9214e-11	<1E-10
TAATTGTA	TACAATTA	5.90763e-13	9.29844e-11	<1E-10
ACACGTGT	ACACGTGT	6.19322e-13	9.70153e-11	<1E-10
$down
