# Supplementary figures and images for: metaRE R Package for Meta-analysis of Transcriptome Data to Identify the Cis-regulatory Code behind the Transcriptional Reprogramming
Source: Preprints.org preprint supplement (doi:10.20944/preprints202005.0227.v1), 2020-05-13

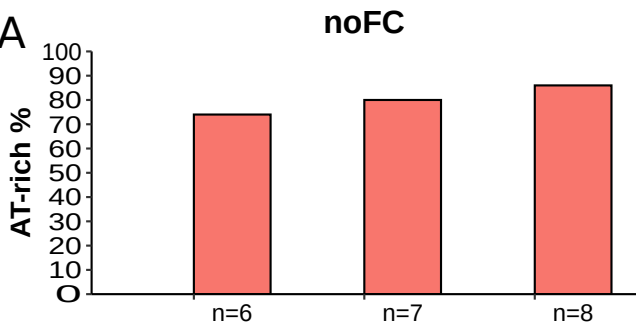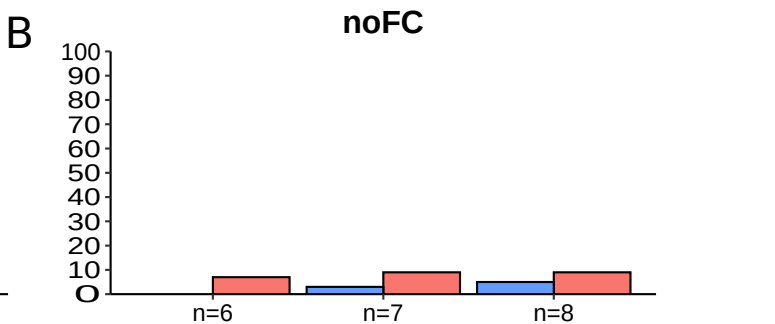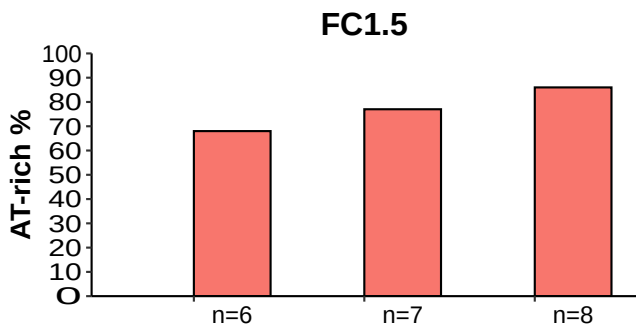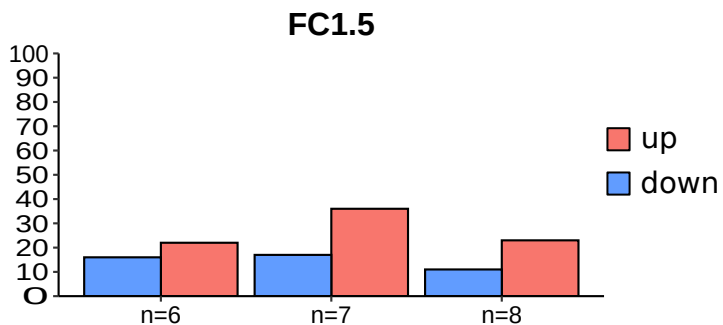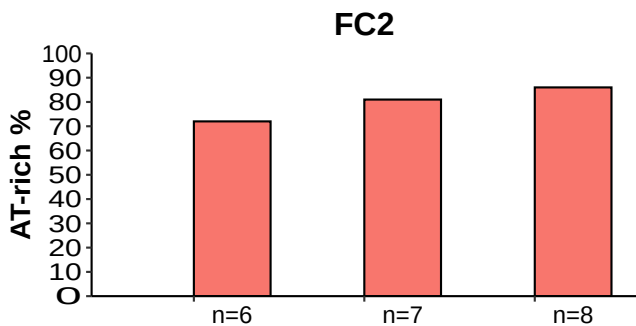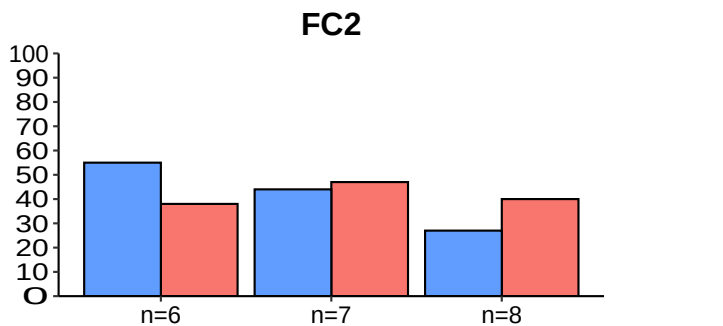

Supplement: Supplementary file 1 [file supplementary]
